# 1 **Determinants of precocious B-cell aging in European** 2 **adolescents living with perinatally acquired HIV-1 after over** 3 **10 years of suppressive therapy**

4  
5 **Authors:** Alessandra Ruggiero<sup>1,2¶</sup>, Giuseppe Rubens Pascucci<sup>1,3¶</sup>, Nicola Cotugno<sup>1,3¶</sup>, Sara  
6 Domínguez-Rodríguez<sup>4</sup>, Stefano Rinaldi<sup>5</sup>, Alfredo Tagarro<sup>4</sup>, Pablo Rojo Conejo<sup>4</sup>, Caroline Foster<sup>6</sup>,  
7 Alasdair Bamford<sup>7,8,9</sup>, Anita De Rossi<sup>10</sup>, Eleni Nastouli<sup>8</sup>, Nigel Klein<sup>11</sup>, Elena Morrocchi<sup>1</sup>, Benoit  
8 Fatou<sup>12, 13, 14</sup>, Kinga K. Smolen<sup>12, 13</sup>, Al Ozonoff<sup>12, 13</sup>, Katherine Luzuriaga<sup>15</sup>, Hanno Steen<sup>12, 13, 14</sup>, Carlo  
9 Giaquinto<sup>16</sup>, Philip Goulder<sup>17</sup>, Paolo Rossi<sup>1,3</sup>, Ofer Levy<sup>12, 13</sup>, Savita Pawha<sup>5</sup>, Paolo Palma<sup>1,3\*</sup> on behalf  
10 of the EPIICAL consortium..

11

12 <sup>1</sup>Academic Department of Pediatrics (DPUO), Research Unit of Clinical Immunology and  
13 Vaccinology, Bambino Gesù Children's Hospital, IRCCS, 00165, Rome, Italy;

14 <sup>2</sup>Department of Neuroscience, Biomedicine and Movement Sciences, University of Verona, Italy;

15 <sup>3</sup>Chair of Pediatrics Department of Systems Medicine, University of Rome "Tor Vergata", Rome  
16 00133, Italy;

17 <sup>4</sup>Pediatric Infectious Diseases Unit, Fundación para la Investigación Biomédica del Hospital 12 de  
18 Octubre. Madrid, Spain,

19 <sup>5</sup>Department of Microbiology and Immunology, University of Miami Miller School of Medicine,  
20 Miami, FL, USA;

21 <sup>6</sup>Department of Paediatric Infectious Diseases, Imperial College Healthcare NHS Trust, London, UK;

22 <sup>7</sup>MRC Clinical Trials Unit at UCL, London, UK;

23 <sup>8</sup>Great Ormond Street Hospital for Children NHS Trust, London, UK;

24 <sup>9</sup>University College London Great Ormond Street Institute of Child Health, London, UK;

25 <sup>10</sup>University of Padova, Padova, Italy;

26 <sup>11</sup>Infection, Immunity & Inflammation Department, UCL GOS Institute of Child Health;

27 <sup>12</sup>*Precision Vaccines Program*, Boston Children Hospital;

28 <sup>13</sup>Harvard Medical School, Boston, MA, USA;

29 <sup>14</sup>Department of Pathology, Boston Children's Hospital, Boston, MA, USA;

30 <sup>15</sup>Program in Molecular Medicine, UMass Chan Medical School, Worcester, MA, USA;

31 <sup>16</sup>Department of Mother and Child Health, University of Padova, Padova, Italy;

32 <sup>17</sup>Department of Paediatrics, Nuffield Department of medicine, Peter Medawar Building for  
33 Pathogen Research, Oxford, UK;

34

35 ¶These authors contributed equally to this work.

36

37 \*Corresponding author: [paolo.palma@opbg.net](mailto:paolo.palma@opbg.net)

38 Paolo Palma, MD, PhD

39 Head of the Research Unit in Congenital and Perinatal Infections, Academic Department of  
40 Pediatrics, Division of Immune and Infectious Diseases

41 IRCCS Bambino Gesù Children's Hospital

42 Address: Piazza S. Onofrio, 4- 00165 Rome, Italy

43 Phone: +390668592455

44 fax: +390668592508

45

## 46 **Epiical Consortium**

47 Mark Cotton, Shaun Barnabas, Nigel Klein, Thanyawee Puthanakit, Louise Kuhn, Andrew Yates,

48 Avy Violari, Kennedy Otwombe, Paula Vaz, Maria Grazia Lain, Tacilta Nampossa, Denise Naniche,

49 Sheila Fernandez-Luis, Elisa Lopez, Holly Peay, Elena Morrocchi, Rajendra Pahwa, Moira Spyer,

50 Vincent Calvez, Anne-Genevieve Marcelin, Maria Angeles Munoz, Annalisa Dalzini, Deborah

51 Persaud, Nicolas Chomont, Mathias Lichterfeld, Silvia Faggion, Daniel Gomez Pena, Andrea Oletto,  
52 Alessandra Nardone, Paola Zangari, Carla Paganin, William James, Inger Lindfors, Shrabon Samiur  
53 Hassan, Francesca Mazzetto, Hellen Akisinku, Musakanya Chingandu, Francesca Rocchi, Ilaria  
54 Peponi, Rob J De Boer, Juliane Schroter, Viviana Giannuzzi, Andrew Yates, Sinead Morris

55

56

57

58

59

60

61

62

63

64

65

66

67

68

69

70

71

72

73

74

75

76

77

78

79

80

81

82

83

84

85

86

87

88

89

90

91

92

93

## 94 **Abstract**

95

96 HIV infection results in a state of chronic immune activation leading to premature immune aging, B-  
97 cells dysfunction, that persists despite prolonged virological suppression. In this scenario,  
98 adolescence living with perinatally acquired HIV (PHIV), deserve a peculiar attention since  
99 potentially exposed for their entire life to chronic immune activation. Here we identified determinants  
100 of precocious aging B cells in 40 PHIV undergoing suppressive antiretroviral therapy (ART) for  
101 median 13.5 years. All individuals started ART by 2<sup>nd</sup> year of life and achieved virus suppression  
102 within the 1<sup>st</sup> year of ART, with majority of patient maintaining suppression until analysis and 5/40  
103 experiencing viral Spike (transient elevation of HIV-1 VL, 50-999 copies/ml). We employed a multi-  
104 omics approach including deep immunological B and T cell phenotype in PBMC, with aging B cells  
105 defined by the expression of T-bet and CD11c; plasma proteomics analysis by mass spectrometry and  
106 serum level of anti-measles antibodies as correlates of humoral response. We found that individuals  
107 with expansion of aging B cell, defined by the expression of T-bet+CD11c+, were those starting  
108 treatment later, presenting detectable levels of cell-associated HIV-1 RNA, history of Spikes, and a  
109 higher frequency of exhausted T-cells, including those expressing PD-1, LAG3, TIGIT. Accordingly,  
110 the proteomic analysis revealed that subjects with expansion of aging B cells and exhausted T cells  
111 had enrichment of proteins involved in immune inflammation and complement activation pathways,  
112 such as CLU and APCS which are also involved in tumor progression. Signs of precocious aging  
113 were associated with a reduced capacity to maintain virological memory against measles vaccination.  
114 To our knowledge, this is the first study focusing on precocious B-cell aging and dysfunctionality in  
115 PHIV with long-term virological suppression. Our experimental strategy enabled identification of  
116 clinical, viral, cellular and plasma soluble markers associated with B-cells aging. Our results pave the  
117 way to further define risk of disease progression or lymphoproliferative disorders in PHIV.

## 118 **Author summary**

119

120 Despite a successful antiretroviral therapy (ART), adolescence living with perinatally acquired HIV  
121 (PHIV) experience B-cells dysfunction, including loss of vaccine-induced immunological memory  
122 and higher risk of developing B-cells associated tumors. It is thus paramount to define novel and  
123 precise correlates of precious aging B cell for the definition of novel therapeutic strategies. Here, we  
124 studied 40 PHIV who started treatment by 2<sup>nd</sup> year of life and maintain virological suppression for  
125 13.5 years, with 5/40 patients experiencing transient elevation of the HIV-1 load in the plasma  
126 (Spike). We applied a multi-omics approach including immunological B and T cell phenotype, plasma  
127 proteomics analysis and serum level of anti-measles antibodies as functional correlates of vaccine-  
128 induced immunity. We found that levels of aging B cells were positively associated with age at ART  
129 start, cell associated HIV-1 RNA (caHIV-1 RNA) and the presence of Spikes. Individuals with  
130 increased proportions of aging B cells had concomitant expansion of exhausted T cells and were  
131 unable to maintain vaccine-induced immunity over time. B-cell aging, and T-cell exhaustion were  
132 also associated with proteins involved in immune inflammation. The factors found here to be  
133 associated with aging B-cell could inform further therapeutic studies.

134

135 **Short title:** Determinants of aging B-cells in PHIV following 10yr of suppressive ART

136 **Word count abstract:** 310

137 **Word count author summary:** 193

138

139 **Keywords:** perinatal HIV/AIDS, immune activation, late ART, aging B-cells, exhausted T-cells,  
140 T-bet, CD11c, proteomic profiling, caHIV-1 RNA

141

## 142 INTRODUCTION

143

144 HIV-1 replication is associated with abnormalities in all major lymphocyte populations, including the  
145 B-cell compartment which results in hyperactivation and exhaustion (1-5). While early antiretroviral  
146 therapy (ART)-initiation partially averts this detrimental condition (6), late ART initiation during the  
147 chronic stage of HIV infection results in precocious aging of the immune system with irreversible  
148 loss of memory B cells and expansion of exhausted B cell subsets including activated memory (AM),  
149 double negative (DN)- and tissue-like memory B cells (TLM)(1, 4, 6, 7). The adhesion molecule  
150 CD11c and the transcription factor T-bet identify a discrete B cell subset, induced by innate activation  
151 and maintained by chronic inflammation or antigen stimulation, may play a detrimental role in  
152 chronic HIV infection (8). Overall, chronic B cell activation observed during HIV infection has been  
153 related to a reduction of functional resting memory B cells resulting in precocious waning of routine  
154 vaccine-induced antibody titers (9-11) and increased risk of age-associated pathologies (12, 13),  
155 including malignancies (14). Indeed, a B cell lymphoproliferative disorder such as Hodgkin's  
156 Lymphoma has remained stable or even increased in HIV-positive adults since the introduction of  
157 ART and is ~11-fold higher than in the HIV-negative population (15). In this context, perinatally HIV  
158 infected children deserve particular attention, given their life-long exposure to chronic immune  
159 activation. It remains unknown whether early ART initiation during acute HIV infection followed by  
160 long-term virological suppression could prevent precocious aging of the B-cell compartment.  
161 Longitudinally well characterized, adolescents living with perinatally acquired HIV-1 (PHIV) with  
162 sustained and prolonged virological suppression represent a unique opportunity to investigate this  
163 scientific question. Indeed, children who started ART in infancy are rarely able to achieve and  
164 consistently maintain viral control for long periods. In the present work, we attempt to identify  
165 determinants of B-cell activation and dysfunctionality in European PHIV who have been treated with  
166 ART for >13 years and have a documented history of virus suppression. We performed deep B and

167 T cell phenotyping with a particular focus on factors associated with lymphocyte aging and extensive  
168 mass spectrometry-based plasma proteomic analysis. Serum levels of anti-measles antibodies (Abs)  
169 were analyzed as correlates of functional humoral immune response.

170

## 171 **RESULTS**

172

### 173 **Study cohort**

174 Patient characteristics are shown in Table 1. Overall, we analyzed 40 PHIV (males 13/40, 32.5%),  
175 that started ART at a median 4.1 months (IQR 0.3-6.2), achieved virological suppression after median  
176 4.69 (2.52–6.26) and were successfully on ART for median 13.5 years (8.1-16.5). We measured cell  
177 associated (ca)HIV-1 DNA (caHIV-1 DNA median 48.8 copies/10<sup>6</sup> PBMC), caHIV-1 RNA in the  
178 Pol and LTR regions. Overall, 5/40 (13%) had experienced a Spike in HIV-1 Viral Load (HIV-1 VL  
179 between 400-999 c/mL, returning to VL <50 c/ml at next blood draw) at some point in their lives  
180 (Table 1, Fig.1).

181

182

183

184

185

186

187

188

189

190

191

192 **Table 1. Characteristics of the study population**

|                                                       | <b>CARMA COHORT</b> |
|-------------------------------------------------------|---------------------|
| N                                                     | 40                  |
| Gender M (%)                                          | 13/40 (32.5%)       |
| <b>At ART start</b>                                   |                     |
| Age median months (IQR)                               | 4.1 (0.3-6.2)       |
| CD4 <sup>+</sup> T cells percentage (IQR)             | 30.5 (19.2-42.5)    |
| Plasma HIV-1 RNA median copies/ $\mu$ L (IQR)         | 5.3 (4.1-5.7)       |
| Time to suppression median months (IQR)               | 4.69 (2.52–6.26)    |
| <b>At analysis</b>                                    |                     |
| Age (years)                                           | 13.5 (8.7-16.6)     |
| Time on ART (years)                                   | 13.5 (8.1-16.5)     |
| CD4 <sup>+</sup> T cells percentage (IQR)             | 41.0 (33.8-46.2)    |
| Spike yes or no, n (%)                                | 5/40 (13%)          |
| caHIV-1 DNA (copies/ $10^6$ PBMCs)                    | 48.4 (6.7-112.5)    |
| caHIV-1 RNA (Pol) (copies/ $10^6$ PBMCs)              | 0.0 (0.0-1.4)       |
| caHIV-1 RNA (LTR) (copies/ $10^6$ PBMCs)              | 2.7 (0.0-44.1)      |
| anti-Measles IgG, median IU/l (IQR)                   | 617 (411-936)       |
| anti-Measles IgG, median years from vaccination (IQR) | 5 (2-8)             |

193

194

195 **Time of ART-start and caRNA are associated with levels of aging T-bet<sup>+</sup> CD11c<sup>+</sup>**

196 **B cells**

197 We performed an extensive immune phenotyping focusing on the B-cell compartment (gating

198 strategy shown in Fig.1A). We found that the proportion of DN and AM expressing both T-bet and

199 CD11c were positively associated with the time of ART initiation, with expansion of T-bet<sup>+</sup>CD11c<sup>+</sup>



200 DN B cells (p=0.03, Fig. 1B) and T-bet<sup>+</sup>CD11c<sup>+</sup> AM B cells (p=0.02, Fig.1C) in those with delayed  
201 ART initiation. We further explored if the levels of aging in the B-cell compartment could be  
202 associated with the HIV-reservoir. Whereas caHIV-1 DNA showed no association with any evidence  
203 of aging B cell compartment, both total caHIV-1 RNA (LTR) and unspliced caHIV-1 RNA (Pol)  
204 demonstrated a positive association with the aging-B cells (Fig. 1D). caHIV-1 RNA was associated  
205 with B cells, AM and DN expressing T-bet<sup>+</sup> alone or together with CD11c, with higher levels of these  
206 B-cell populations present in individuals with detectable ongoing virus expression (Fig. 1E, 1F). We  
207 further stratified the study participants by those who did (group I= 5) or did not (group II= 35)  
208 experience Spikes during their lifetime (Fig. 1g). Group I had significantly higher levels of AM T-  
209 bet<sup>+</sup> cells compared to group II (p=0.04, Fig. 1g). These data showed that age at ART initiation is  
210 strongly correlated with levels of B-cell aging in PHIV and that ongoing HIV-1 replication is  
211 associated with precocious aging.

212

213 **Fig.1 Time of ART initiation and cell associated HIV-1 RNA (caRNA) are associated with**  
214 **expansion of aging B cells.** Gating strategy is shown in a); in b) and c) correlations between aging B  
215 cells and age at ART start are shown; d) correlation plot between viral correlates of recent replication  
216 and aging B-cells / exhausted T-cells are shown; differential analysis between levels of aging B cells  
217 and caRNA or SPIKE being detected vs non-detected is shown in e), f), g), p values are calculated  
218 using Mann Whitney test. Spearman p values are shown in b), c), and d). Significance was set at  
219 p>0.05. DN= double negative; AM= activated memory; MFI= mean fluorescent intensity.

220

221 **Individuals with expansion of aging B cells have elevated levels of exhausted T-**  
222 **cells**

223 We then explored whether the levels of aging within the B-cell compartment corresponded to elevated  
224 levels of exhausted T-cells. Within the aging B-cells we included T-bet<sup>+</sup>CD11c<sup>+</sup>, T-bet<sup>+</sup> only B-cells,

225 or levels of T-bet (MFI) within the whole B compartment as well as within the ‘namely aging’  
226 phenotypes (AM and DN). In assessing the T-cell compartment, we focused on populations  
227 expressing exhaustion biomarkers (Fig. 2). Overall, correlation analysis demonstrated direct positive  
228 association between B and T cells, suggesting that a certain extent of immune aging/exhaustion  
229 persisted in different cellular populations, even many years after successful treatment and virological  
230 control. AM T-bet<sup>+</sup>CD11c<sup>+</sup> was associated with PD-1 expression on CD4 effector (p=0.006) and T  
231 follicular helper cells (Tfh) (p=0.049) cells. Furthermore, TIGIT expression on CD4 subset and on  
232 Tfh showed a strong positive association with all the aging B-cell populations (Fig. 2B). Similarly,  
233 LAG3 expression on transitional memory (TTM) demonstrated a strong association with AM  
234 (p=0.002) and DN (p=0.003) expressing both T-bet and CD11c. These data demonstrated that  
235 premature aging and exhaustion persists simultaneously in both B and T cell compartments, even  
236 after >10 years of ART.

237

238 **Fig.2 Levels of exhausted T-cells are positively associated with levels of aging B-cells.** In a) a  
239 cartoon showing the main findings of the figures are pictured. In b) Heatmap plot showing Spearman  
240 correlations between exhausted T-cells and levels of aging B-cells. Only significant correlations are  
241 shown with red indicating positive correlations and Blue the negative ones. The colored scale going  
242 between 1 and -1 indicates the rho values. DN= double negative; AM= activated memory.  
243 Significance was set at p<0.05.

244

### 245 **Proteomic profiles associated with precocious immune aging**

246 To assess whether humoral/soluble factors might correspond to aging/exhaustion phenotypes, we  
247 performed liquid chromatography/mass spectrometry-based proteomics, detecting 338 plasma  
248 proteins (16). The distinct immunological, virological, and clinical features associated with immune  
249 aging were correlated to the whole plasma proteomic profile (Supp. Fig 1). Two distinct clusters were  
250 initially identified which were negatively (36 proteins) or positively (37 proteins) associated with

251 features of immune exhaustion (Fig. 3A). Such protein clusters were further interrogated for their  
252 biological role by enrichment analysis on Reactome and Gene Ontology (GO) biological processes  
253 databases (Fig. 3B). Immune inflammation and complement cascade activation pathways were  
254 enriched in proteins positively associated with features of immune aging (bottom panels, Fig. 3B and  
255 3C). Indeed, amyloid P component in serum (APCS) and clustering (CLU), both involved in  
256 apoptotic, aging and tumor progression processes (GO:0002673) together with complement cascade  
257 molecules such as C5, CFI, C4BPA, CFB (R-HSA-173623) were positively associated to selected  
258 features of immune aging (Supplementary Table 1). In addition, proteins of light and heavy chain of  
259 immunoglobulins, involved in humoral immune response pathway (GO:0002920) such as IGLV1-  
260 47, IGHV4-34, IGLV2-23, IGHV3-48 were positively associated with immune aging. Enrichment  
261 analysis performed on negatively correlated proteins, showed no association with inflammatory  
262 pathways but only with processes involved in coagulation. Indeed, proteins such as APOH,  
263 SERPINF2, HRG involved in pathways of negative regulation of blood coagulation (GO:0030195)  
264 and platelet degranulation (R-HSA-76002) were negatively associated with features of aging  
265 (Supplementary Table 1).

266

267 **Fig 3. Association between proteomic profiling and levels of aging B-cells and exhausted T-cells.**

268 A) Heatmap plot showing Spearman correlations between the 13 unfunctional features values and the  
269 abundance of the 73 plasma proteins belong to the two clusters identified in correlation matrix with  
270 all 338 proteins. Red indicates positive correlations and Blue negative ones. Bubble plots showing  
271 the top 10 Reactome pathways (B) and GO Biological Process (C) significantly enriched (Adjusted  
272 p-value < 0.05) in proteins positively (Pos) and negatively (Neg) correlated with the 13 unfunctional  
273 features. The proteins were separated into positively and negatively correlated based on the two  
274 clusters showed in the correlation heatmap in panel A. Colors are related at the  $\log_{10}$  adjusted p-value  
275 values and the circle diameter are related at the number of proteins for each term. Significance was  
276 set at  $p < 0.05$ .

## 277 **Expansion of aging B-cells is associated with B-cell dysfunctionality in PHIV**

278 We further assessed whether the presence of aging B-cells could affect the functionality of the B-cell  
279 compartment to maintain immunological memory against vaccinations, such as measles.  
280 Interestingly, the proportion of B-cells expressing the senescence marker T-bet, demonstrated  
281 negative association with the capacity of B-cells to maintain immunological memory to measles  
282 vaccination (Fig. 4A). Higher levels of CD19+CD10-T-bet+ B cells were associated with reduced  
283 plasma concentrations of anti-measles specific IgG (Fig. 4B,  $\rho=-0.338$ ,  $p=0.03546$ ). Of note, this  
284 association was strong regardless of the time of ART initiation (Fig. 4C) or timing from the last  
285 booster vaccination (Fig.4D).

286

287 **Fig 4. Association between aging B-cells and anti-measles humoral response.** A) Heatmap plot  
288 showing Spearman correlations between aging B-cells and anti-measles plasma IgG titers (IU/ml).  
289 Red indicates positive correlations and Blue negative ones. B) Spearman correlation between  
290 CD19+CD10- B-cells T-bet+ and anti-Measle plasma IgG titers, with  $\rho$  and  $p$  defining the statistical  
291 significance. C) and D) Spearman correlation between anti-Measle plasma IgG titers and Age at ART  
292 in m and years from measles vaccination, respectively, with  $\rho$  and  $p$  defining the statistical  
293 significance. Color dots show the distribution of CD19+CD10- B-cells T-bet+. Significance was set  
294 at  $p<0.05$ .

295

## 296 **DISCUSSION**

297

298 To our knowledge, ours is the first long-term follow-up study focusing on precocious B-cell  
299 aging in PHIV with long-term sustained virological suppression. We defined novel cellular and  
300 molecular factors associated with precocious aging in the B-cell compartment. We found that age at  
301 ART initiation, HIV caRNA, levels of exhausted T-cells and specific proteomic profiles demonstrated

302 a strong and positive association with the levels of aging B-cells expressing T-bet alone or together  
303 with CD11c. The expansion of precocious aging B-cells appeared to have a direct impact on the  
304 ability of these patients to maintain vaccine induced immunity over time.

305 PHIV children, particularly younger ones, are immunologically distinct from adults including  
306 with respect to plasticity and immune regulation, resulting in a lower immune activation state (17).  
307 Since chronic immune activation and aging in treated HIV infection is probably driven by residual  
308 HIV replication (18, 19), it could be hypothesized that a prompt initiation of ART early in life  
309 followed by a sustained suppression of the viral replication may be able to minimize this (20). In this  
310 work, we show that perinatally infected adolescents growing with HIV present higher frequency of  
311 aging-B cells directly related to time of ART initiation, despite a history of continuous viral  
312 suppression, documented with at least four HIV-RNA PCR tests per year for over 10 years.

313 We next explored the virological determinants of the expansion of aging B-cell populations  
314 in those with PHIV. Total HIV-1 DNA did correlate with markers of B-cells aging, probably  
315 reflecting the fact that the contribution of the replication-competent virus is diluted within the entire  
316 integrated virus reservoir, which is mainly inactive (21). We thus further explore the markers of recent  
317 virus replication. Both spliced and unspliced HIV-1 caRNA were (AB) strongly associated with levels  
318 of aging B-cells. Spliced HIV-1 RNA may reflect abortive HIV-replication, with only a minor part  
319 being released as virus protein or exosome-associated fragments of RNA that can still trigger immune  
320 activation (22). In contrast, the unspliced HIV-1 RNA is thought to predict the replicative-competence  
321 of the virus reservoirs and has been associated with virologic failure and markers of immune  
322 activation in elite controllers (20, 23, 24), recently proposed as a predictive marker of viral rebound  
323 (25). In our cohort, aging B-cells were not only associated with caRNA, but frequency of aging B-  
324 cells was higher in those PHIV adolescents who experienced HIV spikes in absence of virologic  
325 failure. The association between expansion of aging B-cell, caRNA and viral Spikes is consistent with  
326 the hypothesis that precocious aging in the B cell compartment is dependent on HIV-1 replication

327 and virus particle release, which fuels chronic immune activation, exhaustion and ultimately aging  
328 (26).

329 Multiple mechanisms likely underpin the association between caHIV-1 RNA and aging B-  
330 cells: 1) HIV-1 particles can interact directly with B cells surface-bound via the CD21 receptor with  
331 complement 3 (C3) fragment both in peripheral blood and lymph nodes of HIV-1 patients (Kardava  
332 L. et al. 2018); and 2) B-cells may function as Antigen Presenting Cells (APC) taking direct contact  
333 with follicular T-cells to trigger an anti-HIV-response. In case of HIV-persistence, both B and T cells  
334 should experience a state of chronic immune activation resulting in expansion of signatures associated  
335 with precocious aging (27, 28). Consistent with this hypothesis, our results showed that aging B-cells  
336 existed simultaneously with T-cell exhaustion. T-bet+CD11c+ B-cells showed strong association  
337 with T cells expressing PD-1, TIM-3 and LAG-3 which are inhibitory receptors that are found to be  
338 increased on the T-cell surface as a consequence of persistent activation and described as markers of  
339 cells exhaustion (29). Furthermore, T-bet+CD11c+ aging B-cells were associated with exhausted Tfh  
340 in accordance with other models of chronic antigenic stimulation such as auto-immune diseases (30).  
341 In fact, the excessive T-bet+CD11c+ age-associated B cells (ABCs) (31) not only to contribute to  
342 the production of auto-Abs but also to promote aberrant Tfh cell differentiation and consequently  
343 compromising affinity-based germinal center B-cell selection and Ab-affinity maturation in lupus  
344 mouse models.

345 There are very likely other modes of soluble factor-receptor interactions which can regulate  
346 B cells during HIV-1 infection and may contribute to progression to aging of B-cell compartment  
347 (32). To assess this possibility, we analyzed proteomic profiles of our patients, defining at the plasma  
348 level the status of immune activation and precocious aging found in B and T cell phenotype analysis.  
349 Proteins positively associated with features of HIV-related immune exhaustion were mainly involved  
350 in pro-inflammatory and complement activation processes. While it was previously shown that the  
351 early initiation of suppressive ART over the acute phase of the infection in HIV-infected adults  
352 reduced aspects of the immune activation (18, 19), we here show the persistence of bio humoral

353 correlates of exhaustion and aging in PHIV with a history of long-term viral suppression (>10 years).  
354 Specifically, APCS and CLU, both involved in processes of cell apoptosis, inflammation, and  
355 lymphoproliferative processes (33-35) were positively associated to caHIV-RNA, immune  
356 checkpoint-inhibitors (TIGIT and PD1 on T cells) and exhausted B cells (T-bet+CD11c+ B cell  
357 subsets). Accordingly, such proteins were shown to be higher in virally controlled HIV infected adult  
358 experiencing a poor immune reconstitution and disease progression despite viral control (36).

359 Proteomics further showed that complement cascade activation pathway was enriched in  
360 proteins positively associated with immunological aging features including CLU. As previously  
361 demonstrated, the complement activation contributes to a chronic pro-inflammatory environment  
362 even in well-controlled HIV infected adults (37). Whereas the activation of the complement cascade  
363 during acute HIV infection is largely via activation of the classical pathway (36, 38), recent studies  
364 highlight how complement factors bind IgG3 on exhausted B cell subsets (TLM) in HIV-positive  
365 individuals (32, 39). In line with this evidence, our results showed a positive association of both  
366 caHIV-RNA and aging B cell subsets (T-bet+CD11c+ DN and AM) with plasma complement  
367 cascade proteins. Correlation analysis further revealed an association of proteins involved in  
368 coagulation processes with features of immune aging. As previously shown in adults, a pro-  
369 coagulative imbalance, partially resolved by ART initiation during the acute infection (18, 19) and  
370 persisting over time in HIV infected adults (40), was confirmed in our cohort where a regulation of  
371 fibrinolysis was negatively associated with features of aging in both T and B cell compartment.  
372 Overall, plasma proteomic profiling may suggest that the persistence of complement cascade  
373 perturbation, rather than inflammatory and coagulation proteins may contribute to B -cell exhaustion  
374 and signs of precocious aging in long term virally controlled (>10 years) PHIV.

375 Finally, we explored if the presence of this expanded aging B-cell population could reflect an  
376 impairment of the maintenance of the humoral response towards childhood vaccination, such as  
377 measles immunization which should be maintained throughout life in physiological conditions. We  
378 found that levels of T-bet on the global B-cell population were negatively associated with anti-

379 measles serum IgG. These data are not due to the natural Ab decay because patients were analyzed at  
380 similar median years from vaccination. Our observations raise the possibility that the maintenance of  
381 specific Ab titers is related to a better maturation and preservation of the memory B cell compartment  
382 as a direct consequence of an early ART.

383 In conclusion, our study demonstrated for the first time the impact of a late ART start on B-  
384 cell compartment is still visible despite >10 years of suppressive ART. This set of data also suggests  
385 a role of T-bet and CD11c towards the definition of B-cell exhaustion in PHIV and showed that the  
386 subset of T-bet expressing B cells may negatively affect the capacity of B-cell compartment to  
387 maintain a vaccine-induced functional Ab response. Further studies aiming to confirm whether such  
388 multi-omic signatures of aging/inflammation can inform simplified methods to stratify risk of disease  
389 progression or lymphoproliferative disorders in cohorts of long-term suppressed PHIV are needed.

390

### 391 **Limitations of the study**

392 While our study featured multiple strengths, as with all research it also had a number of important  
393 limitations, including: a) the small size of the CARMA cohort limited the power of correlation  
394 analysis to detect associations; it would be interesting to expand the immunological profiling to a  
395 larger cohort; b) the lack of a control group of exposed uninfected HIV individuals and potentially of  
396 another group that started therapy after 2 years of age, to deeply investigate the impact of late ART  
397 start; and c) the cross-sectional study design.

398

### 399 **Acknowledgements**

400

401 We would like to acknowledge all patients and guardians who decided to participate in the study. We  
402 thank Jennifer Faudella and Giulia Neccia for her administrative assistance. We thank Nadia Iavarone  
403 and Tamara Di Marco for their nursing assistance. We thank Ilaria Pepponi for her precious lab  
404 management work.



## 405 **Author Contribution**

406 **Conceptualization:** Paolo Palma, Alessandra Ruggiero, Giuseppe Rubens Pascucci, Nicola Cotugno.

407 **Data curation:** Sara Dominguez-Rodriguez, Giuseppe Rubens Pascucci

408 **Formal analysis:** Alessandra Ruggiero, Giuseppe Rubens Pascucci, Sara Dominguez-Rodriguez.

409 **Funding acquisition:** Carlo Giaquinto, Paolo Rossi, Paolo Palma, Nicola Cotugno

410 **Investigation:** Alessandra Ruggiero, Giuseppe Rubens Pascucci, Nicola Cotugno, Stefano Rinaldi,

411 Kinga Smolen, Al Ozonoff, Caroline Foster, Alasdair Bamford, Nigel Klein, Anita DeRossi, Eleni

412 Nastouli

413 **Methodology:** Paolo Palma, Alessandra Ruggiero, Giuseppe Rubens Pascucci, Nicola Cotugno

414 **Resources:** Nicola Cotugno, Pablo Rojo, Eleni Nastouli, Nigel Klein, Caroline Foster, Anita De

415 Rossi, Carlo Giaquinto, Paolo Rossi, Savita Pahwa, Paolo Palma.

416 **Supervision:** Hanno Steen, Katherine Luzuriaga, Philip Goulder, Paolo Rossi, Ofer Levy, Savita

417 Pahwa, Paolo Palma

418 **Visualization:** Alessandra Ruggiero, Giuseppe Rubens Pascucci, Nicola Cotugno, Paolo Palma

419 **Writing – original draft:** Alessandra Ruggiero, Giuseppe Rubens Pascucci, Nicola Cotugno, Paolo

420 Palma

421 **Writing – review & editing:** all authors

422

423 **Conflict of interest:** The authors have declared that no conflict of interest exists.

424

## 425 **Financial Disclosure**

426 This study was supported by PENTA-ID Foundation (<http://penta-id.org/>), funded through an

427 independent grant by ViiV Healthcare UK. PP and SP were supported by the NIH grant

428 R01AI127347-05. Work performed at the Laboratory Sciences Core of the Miami was supported by

429 CFAR (P30AI073961) and by the following NIH Co-Funding and Participating Institutes and

430 Centres: NIAID, NCI, NICHD, NHLBI, NIDA, NIMH, NIA, NIDDK, NIGMS, FIC, and OAR. The  
431 funders had no role in study design, data collection and analysis, decision to publish, or preparation  
432 of the manuscript.

## 433 **MATERIALS AND METHODS**

434

### 435 **Ethics statement**

436 This is a multi-center study which include the following institutions: Bambino Gesù Children's  
437 Hospital (OPBG, Rome, Italy), University of Padua (Padova, Italy), University Hospital 12 de  
438 Octubre (Madrid, Spain), Hospital Gregorio Marañón (Madrid, Spain), Imperial College Healthcare  
439 NHS Trust (London, UK), Great Ormond Street Hospital (London, UK), Brighton and Sussex  
440 University Hospitals (Brighton, UK). Each recruiting sites received approval by local ethic  
441 committees (Foster, Dominguez-Rodriguez et al. 2020). Study participants or their legal guardians  
442 gave written informed consent in accordance with the Declaration of Helsinki.

443

### 444 **Study population**

445 The CARMA (Child and Adolescent Reservoir Measurements on early suppressive ART) cohort is  
446 part of the existing EPIICAL consortium (Early treated Perinatally HIV Infected individuals:  
447 Improving Children's Actual Life) (41, 42), a multi-center, multi-cohort global collaboration  
448 primarily supported by PENTA foundation (Pediatric European Network for the Treatment of AIDS).  
449 CARMA included 40 perinatally HIV infected children (PHIV) with following inclusion criteria: (1)  
450 start of ART within the 2<sup>nd</sup> year of life; (2)  $\geq 5$  years of age; (3) viral suppression ( $< 400$  copies/mL)  
451 achieved in the first 12 months after initiation of ART and maintained for at least 5 years with 4  
452 plasma viral load tests performed each year prior to enrolment; (4) A single viral load between 400  
453 and 1000 c/mL (Spike) is permitted annually returning to less than 50 c/ml on next testing (within 3  
454 months); (5) plasma viral load of  $< 50$  HIV-1 RNA copies/ml at enrolment. Wider characteristics of

455 participants were described elsewhere (41) and relevant info provided in Table 1. CD4 counts were  
456 collected at the hospital visits and vaccination history was available from patients' files.

457

## 458 **Samples collection**

459 Plasma samples were obtained by centrifugation of EDTA-blood at 2000xg for 10' and stored at -  
460 80°C until use. Peripheral blood mononuclear cells (PBMCs) were isolated using Ficoll density  
461 gradient centrifugation, resuspended in fetal bovine serum (FBS) supplemented with 10% dimethyl  
462 sulfoxide (DMSO) and stored in liquid nitrogen until use.

463

## 464 **B and T-cell phenotypic analysis**

465 PBMCs from 40 PHIV were thawed, washed, and stained with the LIVE/DEAD fixable BV510 dead  
466 cell stain kit according to manufacturer's protocol (Life Technologies, Carlsbad, CA), used to assess  
467 viability: positive cells were thus excluded from the analysis as they were considered as dead. For B-  
468 cell phenotype, after washing with PBS 10% FBS, cells underwent surface staining with the following  
469 monoclonal antibodies (mAbs, from BD Biosciences): CD3, CD10, CD16 (BV510), CD19 (APC-  
470 R700), CD21 (APC), CD27 (FITC), IgD (BV421), IgM (PE-CF594), IgG (BV605), CD11C (PC-7).  
471 Finally, stained cells were resuspended in 1% paraformaldehyde (PFA) and acquired using Stained  
472 cells were acquired on Cytotflex (Beckman Coulter, Brea, CA) and analysed with FlowJo v10.0.8  
473 (Tree Star) software. Following surface staining fixing and permeabilization of cells (BD  
474 permeabilization solution II 1x), cells were stained with an anti T-bet BV650 (04-46, BD). For T-cell  
475 phenotype, LIVE/DEAD Fixable Blue Dead Cell Stain Kit from Thermo Fisher Scientific (Boston,  
476 MA) was used to detect and exclude dead cells. After washing with PBS 10% FBS, cells underwent  
477 surface staining with the following monoclonal antibodies as previously described (Rinaldi S. et al.  
478 2021): LAG3 BV650, TIGIT PE-Cy7, CD19 Alexa Fluor 700, HLA-DR PE, CCR7 FITC, CD38  
479 BV711, PD-L1 BV711, PD-1 BV421, and CD8 PerCP from BioLegend (San Diego, CA); CD3

480 BUV496, CD4 APC-Cy7, CD4 APC-H7, PD-1 BV650, CXCR5 Alexa Fluor 647, and CD27 BV480  
481 from BD Biosciences (San Jose, CA); and CD45RO PE-Cy5.5 from Beckman Coulter (Fullerton,  
482 CA). Finally, stained cells were resuspended in 1% paraformaldehyde (PFA) and acquired using  
483 Stained cells were acquired on a BD LSRFortessa (BD Biosciences) and analysis performed using  
484 FlowJo v10.0.8 (Tree Star) software. Gating strategies for B-cell phenotypes, T-bet and CD11c are  
485 provided in Fig.1. Gating strategies for T-cell analysis were shown previously (28). Positive cell  
486 gating was set using fluorescence minus one control. All the reagents were tested and titrated for  
487 optimum concentration before usage.

488

### 489 **Quantitative total HIV-1 DNA assay**

490 Total HIV-1 DNA was quantified in PBMCs of 40 PHIV by real-time quantitative reverse  
491 transcription PCR (qRT-PCR) as previously described (43). All measurements were done in  
492 triplicates. Results are reported as copies of HIV-1 per million cells.

493

### 494 **Quantitative caHIV-1 RNA assay**

495 caHIV-1 RNA was quantified as described in (28). Briefly, Qiasymphony automated platform was  
496 used to isolate total cellular RNA (DSP virus/pathogen mini kit (Qiagen). RNA was further processed  
497 in an in-house assay using primers of previously validated assays (44, 45) to selectively amplify total  
498 (LTR) and unspliced (pol) ca-HIV-1 RNA via qRT-PCR. In order to express caHIV-1 RNA copies  
499 per  $10^6$  PBMC, the caHIV-1 RNA measurements were normalized against cellular genes TBP1 and  
500 IPO8 expression.

501

### 502 **Plasma proteomics preparation and analysis**

503 Plasma proteomics data was produced using a High-performance liquid chromatography mass  
504 spectrometry (HPLC/MS) method as previously described (16). The sample processing employed an

505 MStern blotting protocol previously developed and validated *in house* (46-49). In brief, 1  $\mu$ L of  
506 plasma (~50  $\mu$ g of proteins) was mixed in 100  $\mu$ L of urea buffer. Following reduction and alkylation  
507 of the cysteine side chains, an amount of 15  $\mu$ g of proteins was loaded on to a 96-well plate with a  
508 polyvinylidene fluoride (PVDF) membrane at the bottom (Millipore-Sigma), which had been  
509 previously activated and primed. Trypsinization of the proteins adsorbed to the membrane was  
510 achieved by incubation with the protease for 2h at 37°C. Resulting tryptic peptides were eluted off  
511 the membrane with 40% acetonitrile (ACN)/0.1% formic acid (FA). The peptides were subsequently  
512 cleaned-up using a 96-well MACROSPIN C18 plate (TARGA, The NestGroup Inc.). The samples  
513 were analysed on the same LC/MS system as the data-dependent acquisition (DDA) runs using  
514 identical LC parameters (45 minutes gradient, 59 minutes total runtime). The m/z range 375–1200,  
515 covering 95% of the identified peptide, was divided into 15 variable windows based on density, and  
516 the following parameters were used for the subsequent DIA analysis: resolution 35000 @ m/z 200,  
517 AGC target 3e6, maximum IT 120 ms, fixed first mass m/z 200, NCE 27. The DIA scans preceded  
518 an MS1 Full scan with identical parameters yielding a total cycle time of 2.4s. We use a previously  
519 published in house generated spectral library (16). All DIA data were directly analysed in Spectronaut  
520 v12.0.20491.18 (Biognosys, Switzerland). Standard search settings were employed, which included  
521 enabling dynamic peak detection, automatic precision nonlinear iRT calibration, interference  
522 correction, and cross run normalization (total peak area). All results were filtered by a q-value of 0.01  
523 (corresponding to an FDR of 1% on the precursor and protein levels). Otherwise default settings were  
524 used.

525

## 526 **Anti-Measles IgG**

527 Plasma Anti-Measles IgG titres were measured using EuroImmunAnti-Morbillo ELISA (IgG) (LOT  
528 E180111AE), following manufacturer's instruction. Results given as UI/L.

529

## 530 **Statistical analyses**

531 Between-group comparisons were performed using non-parametric U-Mann-Whitney test for  
532 continuous variables or Fisher's exact test for categorical variables. Spearman correlation ( $\rho$ ) was  
533 used to describe the association between continuous variables. Proteins and cell populations with  
534  $>70\%$  zero values or  $>50\%$  missing data were omitted from heatmaps. To focus on single associations  
535 (Fig. 1d, 2b and 3a) only statistically significant correlations ( $p$ -values  $<0.05$ ) were shown. In other  
536 cases, to highlight clustering patterns, were shown all correlations (Fig. 3a and Supp Fig. 1). The  
537 chromatic scale is proportional to the Spearman correlation, using red for positive correlations ( $\rho >$   
538  $0$ ) and blue for negative ones ( $\rho < 0$ ). To investigate the biological role of the proteins belonging  
539 to the two clusters (Fig 3a), a pathway enrichment analysis in Reactome 2016 and GO Biological  
540 Process 2021 databases was performed using the R package "enrichr" v3.0 (50). Statistical analyses  
541 were performed using R (version 4.1.1) or GraphPad Prism 6.0 software (San Diego, CA).

542

## 543 REFERENCES

- 544 1. Moir S, Fauci AS. Pathogenic mechanisms of B-lymphocyte dysfunction in HIV disease. *J*  
545 *Allergy Clin Immunol.* 2008;122(1):12-9; quiz 20-1.
- 546 2. Moir S, Ho J, Malaspina A, Wang W, DiPoto AC, O'Shea MA, et al. Evidence for HIV-  
547 associated B cell exhaustion in a dysfunctional memory B cell compartment in HIV-infected  
548 viremic individuals. *J Exp Med.* 2008;205(8):1797-805.
- 549 3. Amu S, Ruffin N, Rethi B, Chiodi F. Impairment of B-cell functions during HIV-1  
550 infection. *AIDS.* 2013;27(15):2323-34.
- 551 4. Pensiero S, Galli L, Nozza S, Ruffin N, Castagna A, Tambussi G, et al. B-cell subset  
552 alterations and correlated factors in HIV-1 infection. *AIDS.* 2013;27(8):1209-17.
- 553 5. Palma P, Rinaldi S, Cotugno N, Santilli V, Pahwa S, Rossi P, et al. Premature B-cell  
554 senescence as a consequence of chronic immune activation. *Human vaccines &*  
555 *immunotherapeutics.* 2014;10(7):2083-8.
- 556 6. Moir S, Buckner CM, Ho J, Wang W, Chen J, Waldner AJ, et al. B cells in early and chronic  
557 HIV infection: evidence for preservation of immune function associated with early initiation of  
558 antiretroviral therapy. *Blood.* 2010;116(25):5571-9.
- 559 7. Pensiero S, Cagigi A, Palma P, Nilsson A, Capponi C, Freda E, et al. Timing of HAART  
560 defines the integrity of memory B cells and the longevity of humoral responses in HIV-1 vertically-  
561 infected children. *Proc Natl Acad Sci U S A.* 2009;106(19):7939-44.
- 562 8. Winslow GM, Papillion AM, Kenderes KJ, Levack RC. CD11c+ T-bet+ memory B cells:  
563 Immune maintenance during chronic infection and inflammation? *Cell Immunol.* 2017;321:8-17.
- 564 9. Malaspina A, Moir S, Orsega SM, Vasquez J, Miller NJ, Donoghue ET, et al. Compromised  
565 B cell responses to influenza vaccination in HIV-infected individuals. *J Infect Dis.*  
566 2005;191(9):1442-50.

- 567 10. Kerneis S, Launay O, Turbelin C, Batteux F, Hanslik T, Boelle PY. Long-term immune  
568 responses to vaccination in HIV-infected patients: a systematic review and meta-analysis. *Clin*  
569 *Infect Dis*. 2014;58(8):1130-9.
- 570 11. Cotugno N, De Armas L, Pallikkuth S, Rinaldi S, Issac B, Cagigi A, et al. Perturbation of B  
571 Cell Gene Expression Persists in HIV-Infected Children Despite Effective Antiretroviral Therapy  
572 and Predicts H1N1 Response. *Front Immunol*. 2017;8:1083.
- 573 12. Pallikkuth S, de Armas L, Rinaldi S, Pahwa S. T Follicular Helper Cells and B Cell  
574 Dysfunction in Aging and HIV-1 Infection. *Front Immunol*. 2017;8:1380.
- 575 13. Rinaldi S, Pallikkuth S, George VK, de Armas LR, Pahwa R, Sanchez CM, et al.  
576 Paradoxical aging in HIV: immune senescence of B Cells is most prominent in young age. *Aging*.  
577 2017;9(4):1307-25.
- 578 14. Zicari S, Sessa L, Cotugno N, Ruggiero A, Morrocchi E, Concato C, et al. Immune  
579 Activation, Inflammation, and Non-AIDS Co-Morbidities in HIV-Infected Patients under Long-  
580 Term ART. *Viruses*. 2019;11(3).
- 581 15. Shepherd L, Borges AH, Harvey R, Bower M, Grulich A, Silverberg M, et al. The extent of  
582 B-cell activation and dysfunction preceding lymphoma development in HIV-positive people. *HIV*  
583 *Med*. 2018;19(2):90-101.
- 584 16. Bennike TB, Bellin MD, Xuan Y, Stensballe A, Moller FT, Beilman GJ, et al. A Cost-  
585 Effective High-Throughput Plasma and Serum Proteomics Workflow Enables Mapping of the  
586 Molecular Impact of Total Pancreatectomy with Islet Autotransplantation. *Journal of proteome*  
587 *research*. 2018;17(5):1983-92.
- 588 17. Muenchhoff M, Prendergast AJ, Goulder PJ. Immunity to HIV in Early Life. *Front*  
589 *Immunol*. 2014;5:391.
- 590 18. Sereti I, Krebs SJ, Phanuphak N, Fletcher JL, Slike B, Pinyakorn S, et al. Persistent, Albeit  
591 Reduced, Chronic Inflammation in Persons Starting Antiretroviral Therapy in Acute HIV Infection.  
592 *Clin Infect Dis*. 2017;64(2):124-31.
- 593 19. Sereti I, Altfeld M. Immune activation and HIV: an enduring relationship. *Curr Opin HIV*  
594 *AIDS*. 2016;11(2):129-30.
- 595 20. Malatinkova E, De Spiegelaere W, Bonczkowski P, Kiselina M, Vervisch K, Trypsteen  
596 W, et al. Impact of a decade of successful antiretroviral therapy initiated at HIV-1 seroconversion  
597 on blood and rectal reservoirs. *Elife*. 2015;4:e09115.
- 598 21. Mexas AM, Graf EH, Pace MJ, Yu JJ, Papasavvas E, Azzoni L, et al. Concurrent measures  
599 of total and integrated HIV DNA monitor reservoirs and ongoing replication in eradication trials.  
600 *AIDS*. 2012;26(18):2295-306.
- 601 22. Younas M, Psomas C, Reynes J, Corbeau P. Immune activation in the course of HIV-1  
602 infection: Causes, phenotypes and persistence under therapy. *HIV Med*. 2016;17(2):89-105.
- 603 23. Pasternak AO, Lukashov VV, Berkhout B. Cell-associated HIV RNA: a dynamic biomarker  
604 of viral persistence. *Retrovirology*. 2013;10:41.
- 605 24. Hunt PW, Hatano H, Sinclair E, Lee TH, Busch MP, Martin JN, et al. HIV-specific CD4+ T  
606 cells may contribute to viral persistence in HIV controllers. *Clin Infect Dis*. 2011;52(5):681-7.
- 607 25. Pasternak AO, Grijnsen ML, Wit FW, Bakker M, Jurriaans S, Prins JM, et al. Cell-associated  
608 HIV-1 RNA predicts viral rebound and disease progression after discontinuation of temporary early  
609 ART. *JCI insight*. 2020;5(6).
- 610 26. Sokoya T, Steel HC, Nieuwoudt M, Rossouw TM. HIV as a Cause of Immune Activation  
611 and Immunosenescence. *Mediators Inflamm*. 2017;2017:6825493.
- 612 27. de Armas LR, Pallikkuth S, Rinaldi S, Pahwa R, Pahwa S. Implications of Immune  
613 Checkpoint Expression During Aging in HIV-Infected People on Antiretroviral Therapy. *AIDS*  
614 *research and human retroviruses*. 2019;35(11-12):1112-22.
- 615 28. Rinaldi S, Pallikkuth S, Cameron M, de Armas LR, Cotugno N, Dinh V, et al. Impact of  
616 Early Antiretroviral Therapy Initiation on HIV-Specific CD4 and CD8 T Cell Function in  
617 Perinatally Infected Children. *Journal of immunology*. 2020;204(3):540-9.

- 618 29. Pardons M, Baxter AE, Massanella M, Pagliuzza A, Fromentin R, Dufour C, et al. Single-  
619 cell characterization and quantification of translation-competent viral reservoirs in treated and  
620 untreated HIV infection. *PLoS pathogens*. 2019;15(2):e1007619.
- 621 30. Zhang W, Zhang H, Liu S, Xia F, Kang Z, Zhang Y, et al. Excessive CD11c(+)Tbet(+) B  
622 cells promote aberrant TFH differentiation and affinity-based germinal center selection in lupus.  
623 *Proc Natl Acad Sci U S A*. 2019;116(37):18550-60.
- 624 31. Rubtsova K, Rubtsov AV, Thurman JM, Mennona JM, Kappler JW, Marrack P. B cells  
625 expressing the transcription factor T-bet drive lupus-like autoimmunity. *J Clin Invest*.  
626 2017;127(4):1392-404.
- 627 32. Kardava L, Moir S. B-cell abnormalities in HIV-1 infection: roles for IgG3 and T-bet. *Curr*  
628 *Opin HIV AIDS*. 2019;14(4):240-5.
- 629 33. Nascimento AF, Pinkus JL, Pinkus GS. Clusterin, a marker for anaplastic large cell  
630 lymphoma immunohistochemical profile in hematopoietic and nonhematopoietic malignant  
631 neoplasms. *American journal of clinical pathology*. 2004;121(5):709-17.
- 632 34. Saffer H, Wahed A, Rassidakis GZ, Medeiros LJ. Clusterin expression in malignant  
633 lymphomas: a survey of 266 cases. *Modern pathology : an official journal of the United States and*  
634 *Canadian Academy of Pathology, Inc*. 2002;15(11):1221-6.
- 635 35. Nascimento AF, Hirsch MS, Cviko A, Quade BJ, Nucci MR. The role of CD10 staining in  
636 distinguishing invasive endometrial adenocarcinoma from adenocarcinoma involving adenomyosis.  
637 *Modern pathology : an official journal of the United States and Canadian Academy of Pathology,*  
638 *Inc*. 2003;16(1):22-7.
- 639 36. Schein TN, Blackburn TE, Heath SL, Barnum SR. Plasma levels of soluble membrane  
640 attack complex are elevated despite viral suppression in HIV patients with poor immune  
641 reconstitution. *Clinical and experimental immunology*. 2019;198(3):359-66.
- 642 37. Troy SB, Rosshem AE, Hilliard DD, Cunningham TD. Brief Report: Seroprevalence of  
643 Pertussis Infection in HIV-Infected Adults in the United States. *Journal of acquired immune*  
644 *deficiency syndromes*. 2016;73(3):282-6.
- 645 38. Stoiber H, Speth C, Dierich MP. Role of complement in the control of HIV dynamics and  
646 pathogenesis. *Vaccine*. 2003;21 Suppl 2:S77-82.
- 647 39. Yu Q, Yu R, Qin X. The good and evil of complement activation in HIV-1 infection.  
648 *Cellular & molecular immunology*. 2010;7(5):334-40.
- 649 40. Baker JV. Chronic HIV disease and activation of the coagulation system. *Thrombosis*  
650 *research*. 2013;132(5):495-9.
- 651 41. Foster C, Dominguez-Rodriguez S, Tagarro A, Gkouleli T, Heaney J, Watters S, et al. The  
652 CARMA Study: Early Infant Antiretroviral Therapy-Timing Impacts on Total HIV-1 DNA  
653 Quantitation 12 Years Later. *Journal of the Pediatric Infectious Diseases Society*. 2021;10(3):295-  
654 301.
- 655 42. Palma P, Foster C, Rojo P, Zangari P, Yates A, Cotugno N, et al. The EPIICAL project: an  
656 emerging global collaboration to investigate immunotherapeutic strategies in HIV-infected children.  
657 *Journal of virus eradication*. 2015;1(3):134-9.
- 658 43. Butler K, Inshaw J, Ford D, Bernays S, Scott K, Kenny J, et al. BREATHER (PENTA 16)  
659 short-cycle therapy (SCT) (5 days on/2 days off) in young people with chronic human  
660 immunodeficiency virus infection: an open, randomised, parallel-group Phase II/III trial. *Health*  
661 *technology assessment*. 2016;20(49):1-108.
- 662 44. Busby E, Whale AS, Ferns RB, Grant PR, Morley G, Campbell J, et al. Instability of 8E5  
663 calibration standard revealed by digital PCR risks inaccurate quantification of HIV DNA in clinical  
664 samples by qPCR. *Scientific reports*. 2017;7(1):1209.
- 665 45. Jones GM, Busby E, Garson JA, Grant PR, Nastouli E, Devonshire AS, et al. Digital PCR  
666 dynamic range is approaching that of real-time quantitative PCR. *Biomolecular detection and*  
667 *quantification*. 2016;10:31-3.



- 668 46. Wilkins MR, Wood JA, Adu D, Lote CJ, Kendall MJ, Michael J. Change in plasma  
669 immunoreactive atrial natriuretic peptide during sequential ultrafiltration and haemodialysis.  
670 *Clinical science*. 1986;71(2):157-60.
- 671 47. Bennike TB, Fatou B, Angelidou A, Diray-Arce J, Falsafi R, Ford R, et al. Preparing for  
672 Life: Plasma Proteome Changes and Immune System Development During the First Week of  
673 Human Life. *Front Immunol*. 2020;11:578505.
- 674 48. Bennike TB, Steen H. High-Throughput Parallel Proteomic Sample Preparation Using 96-  
675 Well Polyvinylidene Fluoride (PVDF) Membranes and C18 Purification Plates. *Methods in*  
676 *molecular biology*. 2017;1619:395-402.
- 677 49. Lee AH, Shannon CP, Amenyogbe N, Bennike TB, Diray-Arce J, Idoko OT, et al. Dynamic  
678 molecular changes during the first week of human life follow a robust developmental trajectory.  
679 *Nature communications*. 2019;10(1):1092.
- 680 50. Kuleshov MV, Jones MR, Rouillard AD, Fernandez NF, Duan Q, Wang Z, et al. Enrichr: a  
681 comprehensive gene set enrichment analysis web server 2016 update. *Nucleic acids research*.  
682 2016;44(W1):W90-7.

683

684

## 685 **Supporting information captions**

686

687

688 **Supplementary Fig. 1 Heatmaps showing Spearman correlations between**  
689 **abundance of 338 plasma proteins and 13 selected unfunctional features.** Red  
690 indicates positive correlations and Blue negative ones.

691

692 **Supplementary Table. 1 Overview of proteins within the Reactome and GO**  
693 **biological process pathways associated with aging B-cells and exhausted T-cells.**

694

695

696

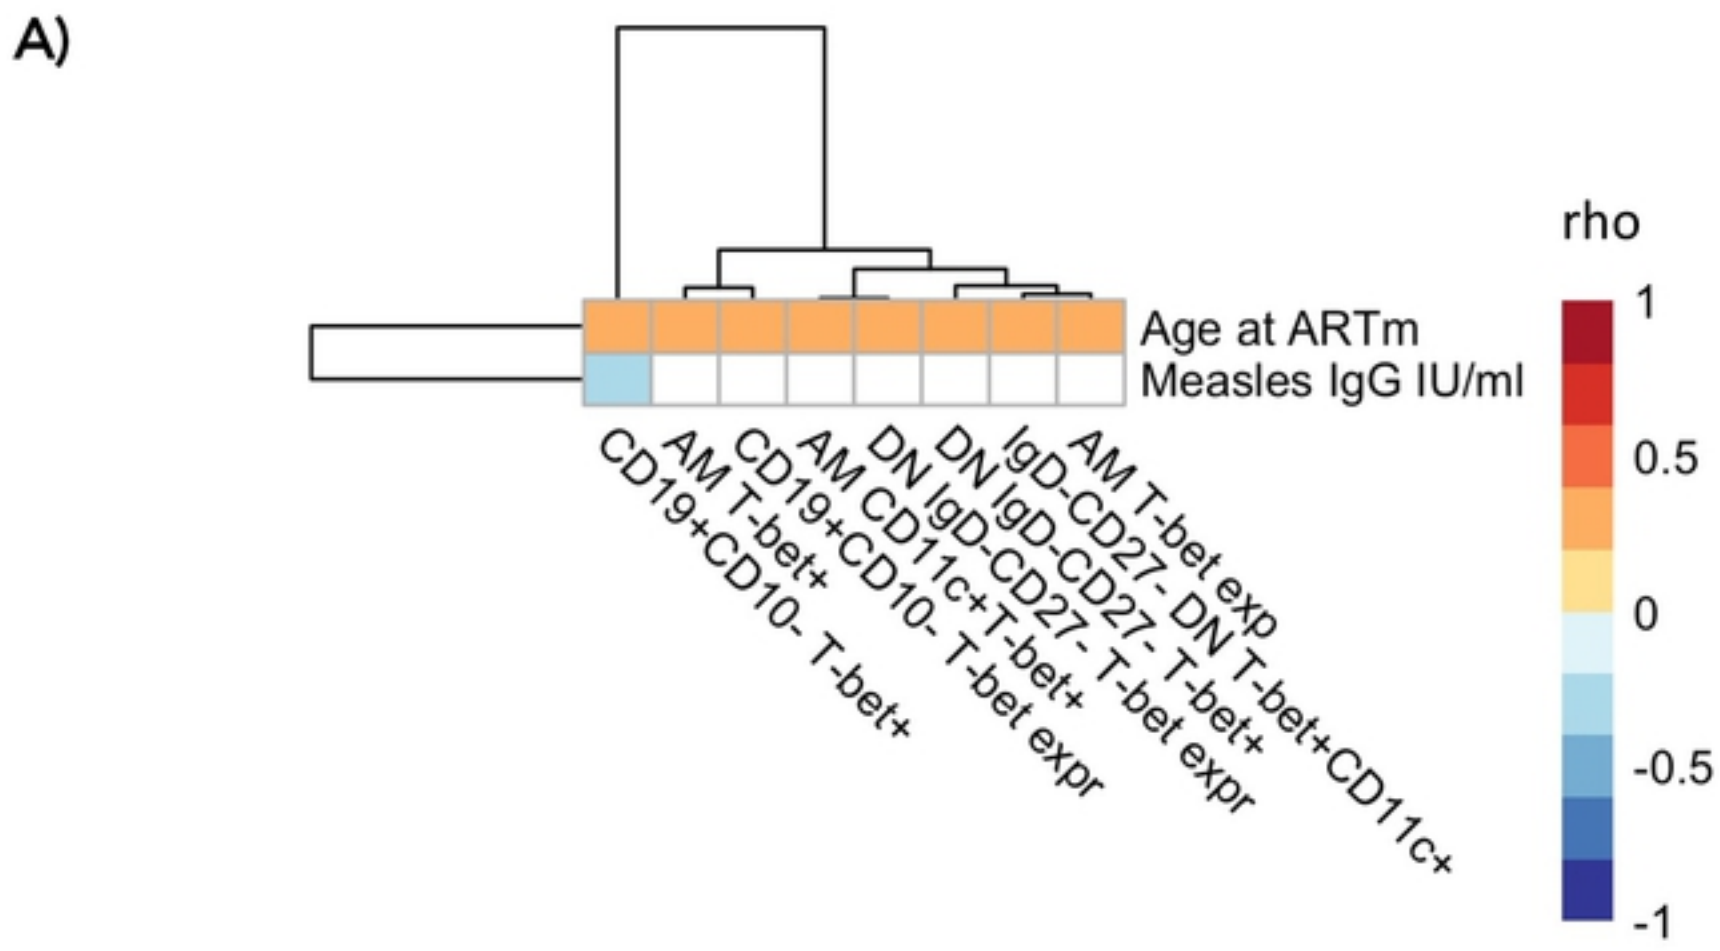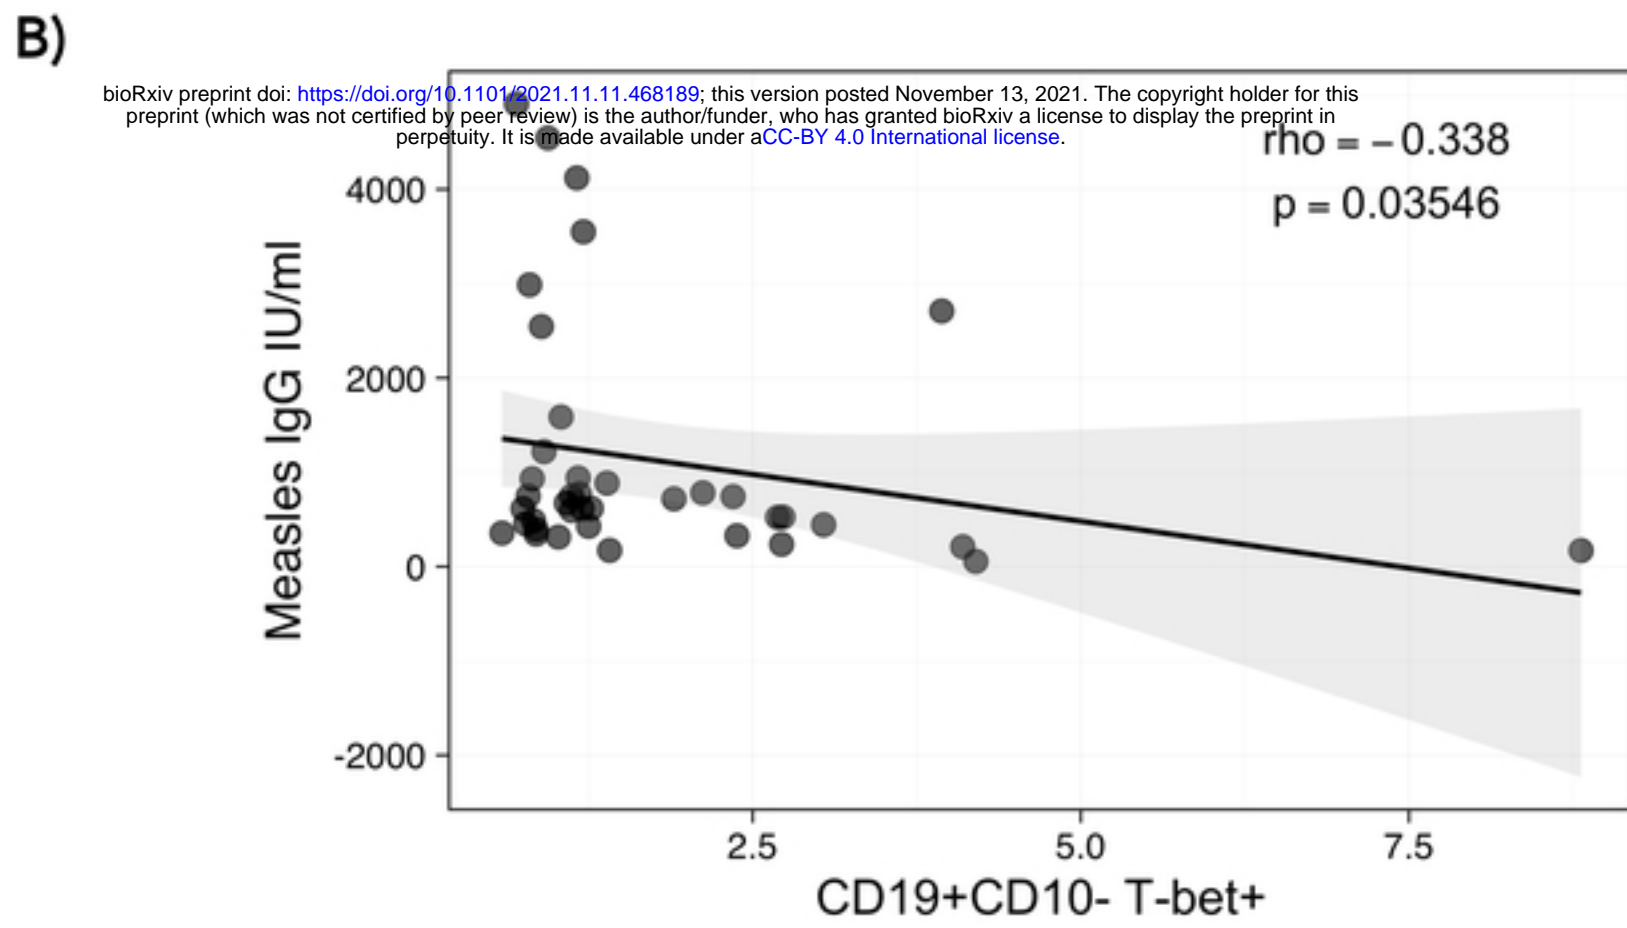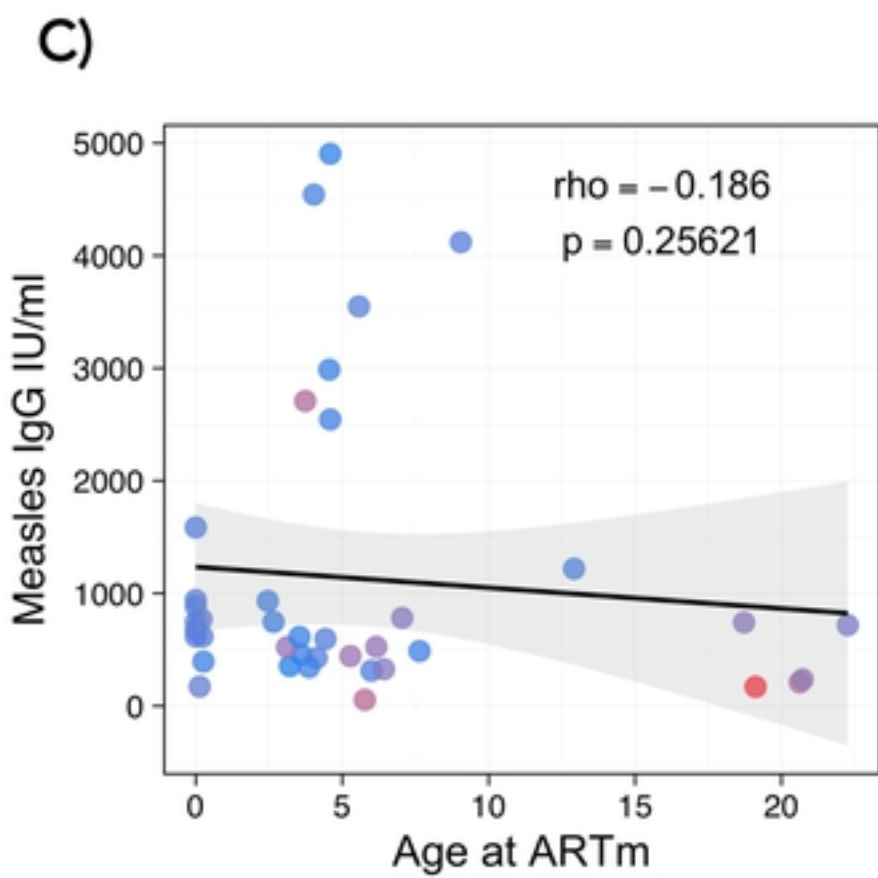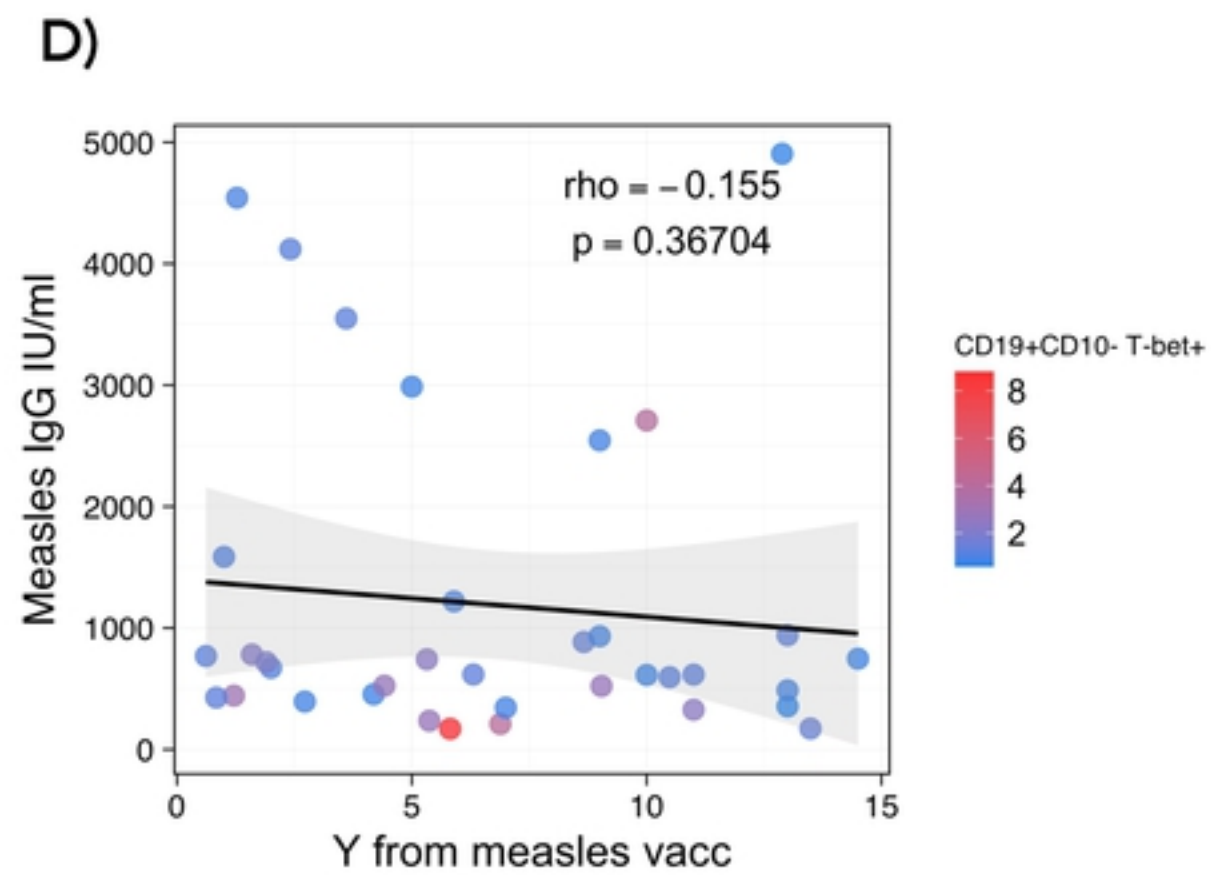

Fig.4

A)

## AGING B CELL

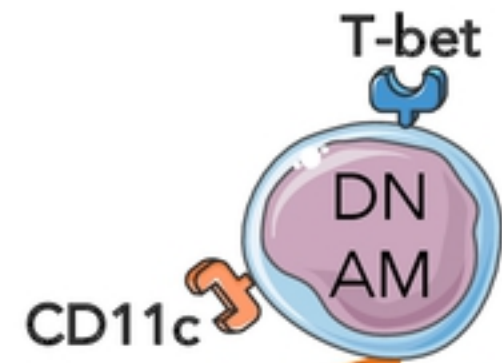

T cells (PD-1, LAG3, TIGIT)

bioRxiv preprint doi: <https://doi.org/10.1101/2021.11.11.468189>; this version posted November 13, 2021. The copyright holder for this preprint (which was not certified by peer review) is the author/funder, who has granted bioRxiv a license to display the preprint in perpetuity. It is made available under aCC-BY 4.0 International license.

B)

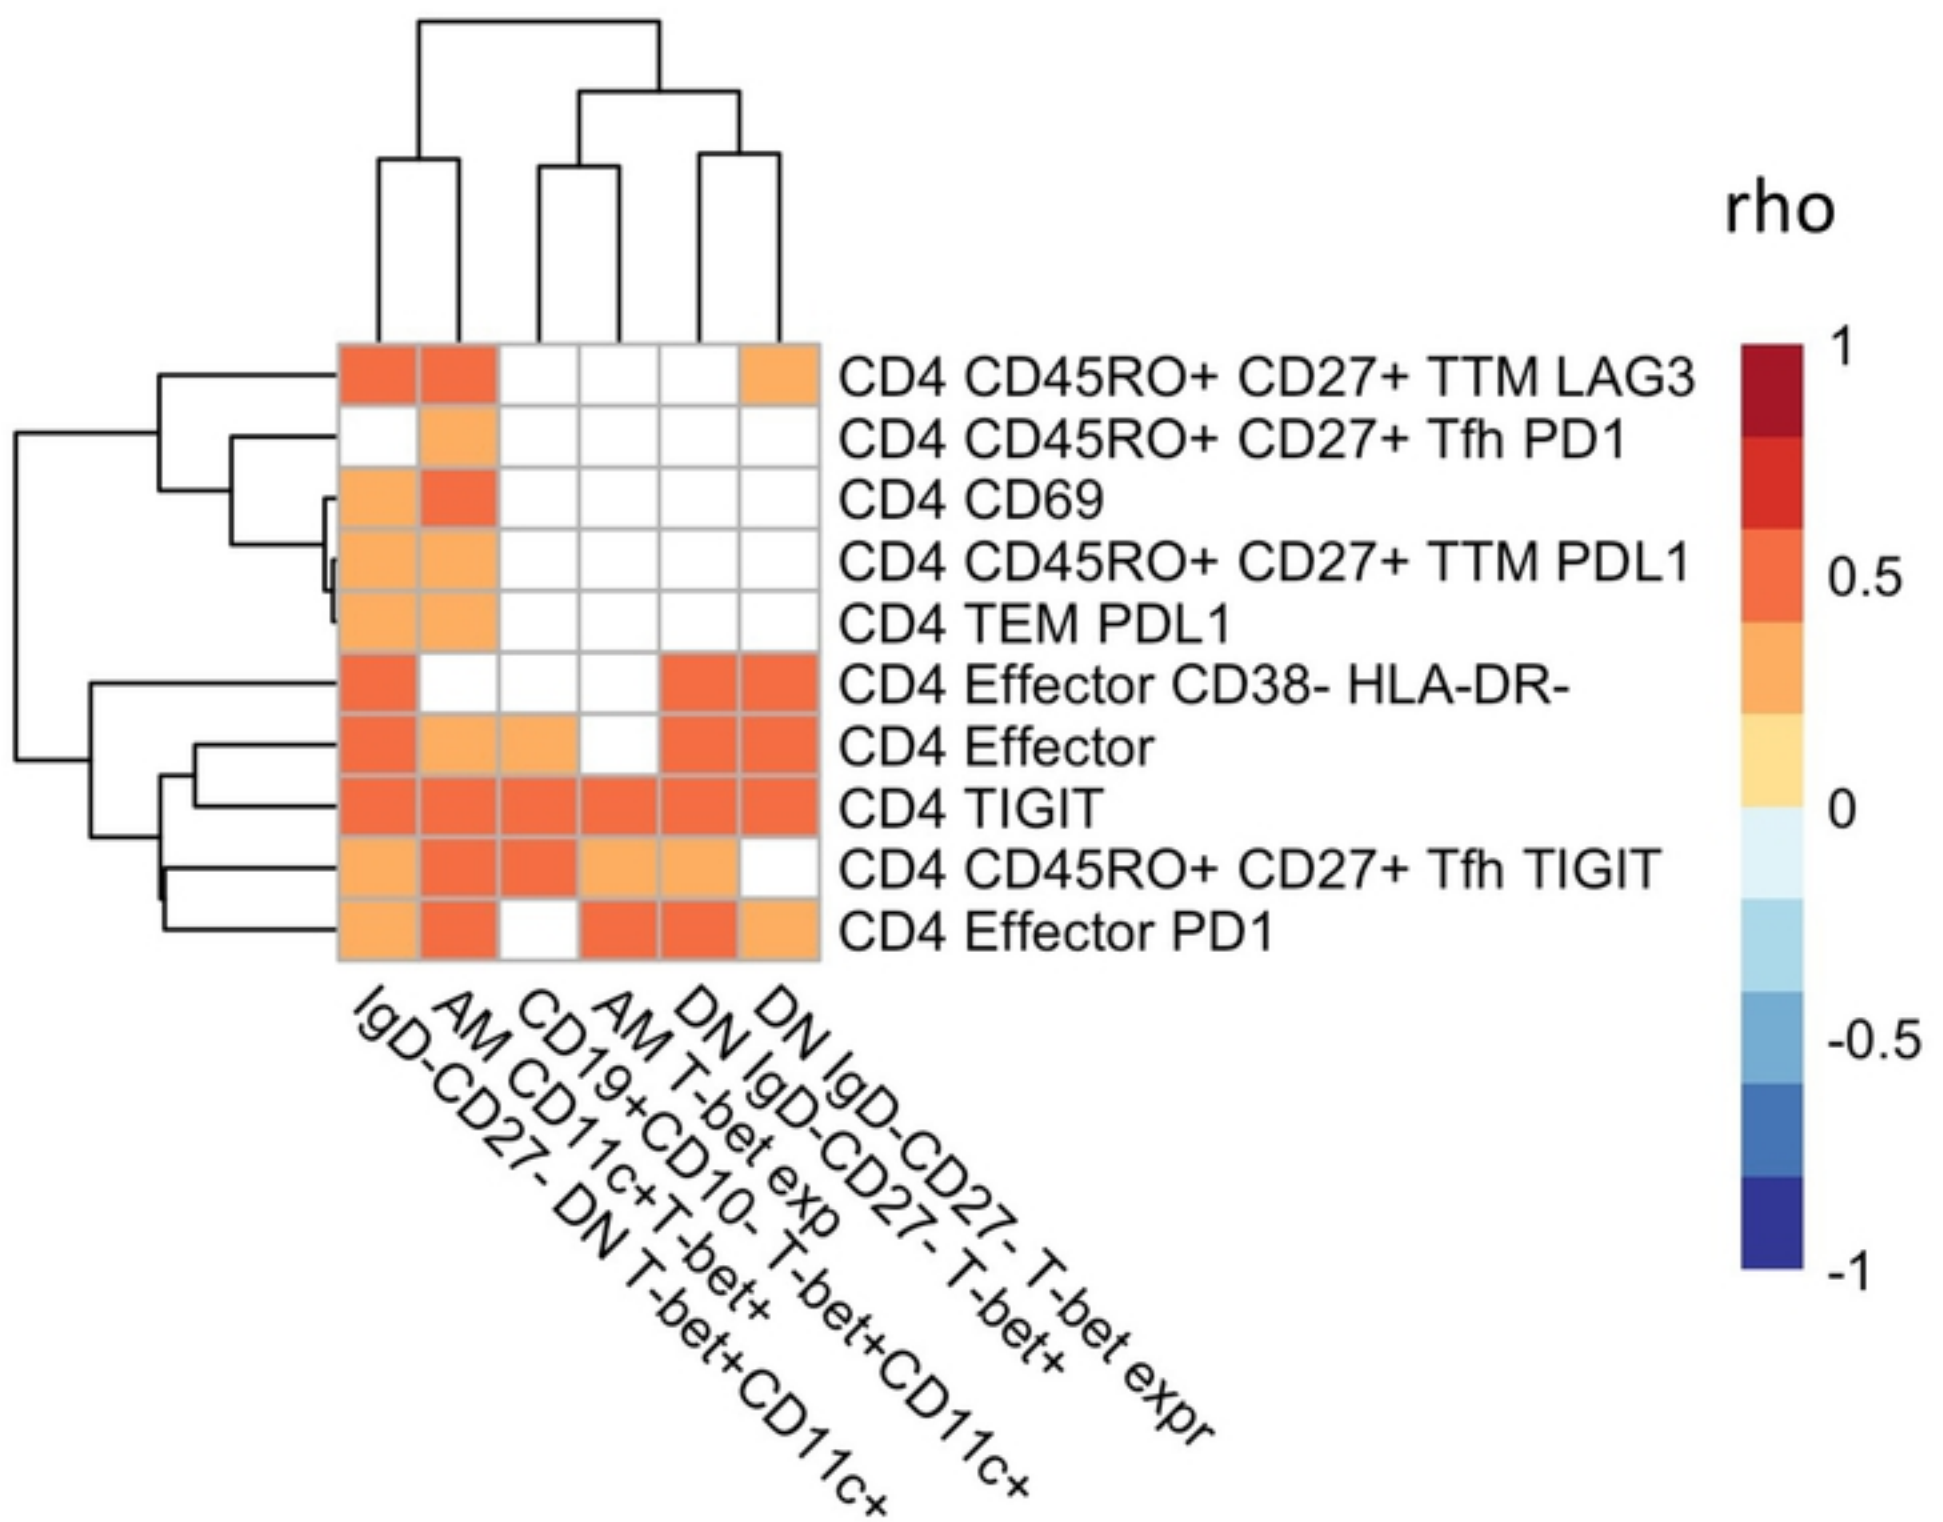

Fig.2

A)

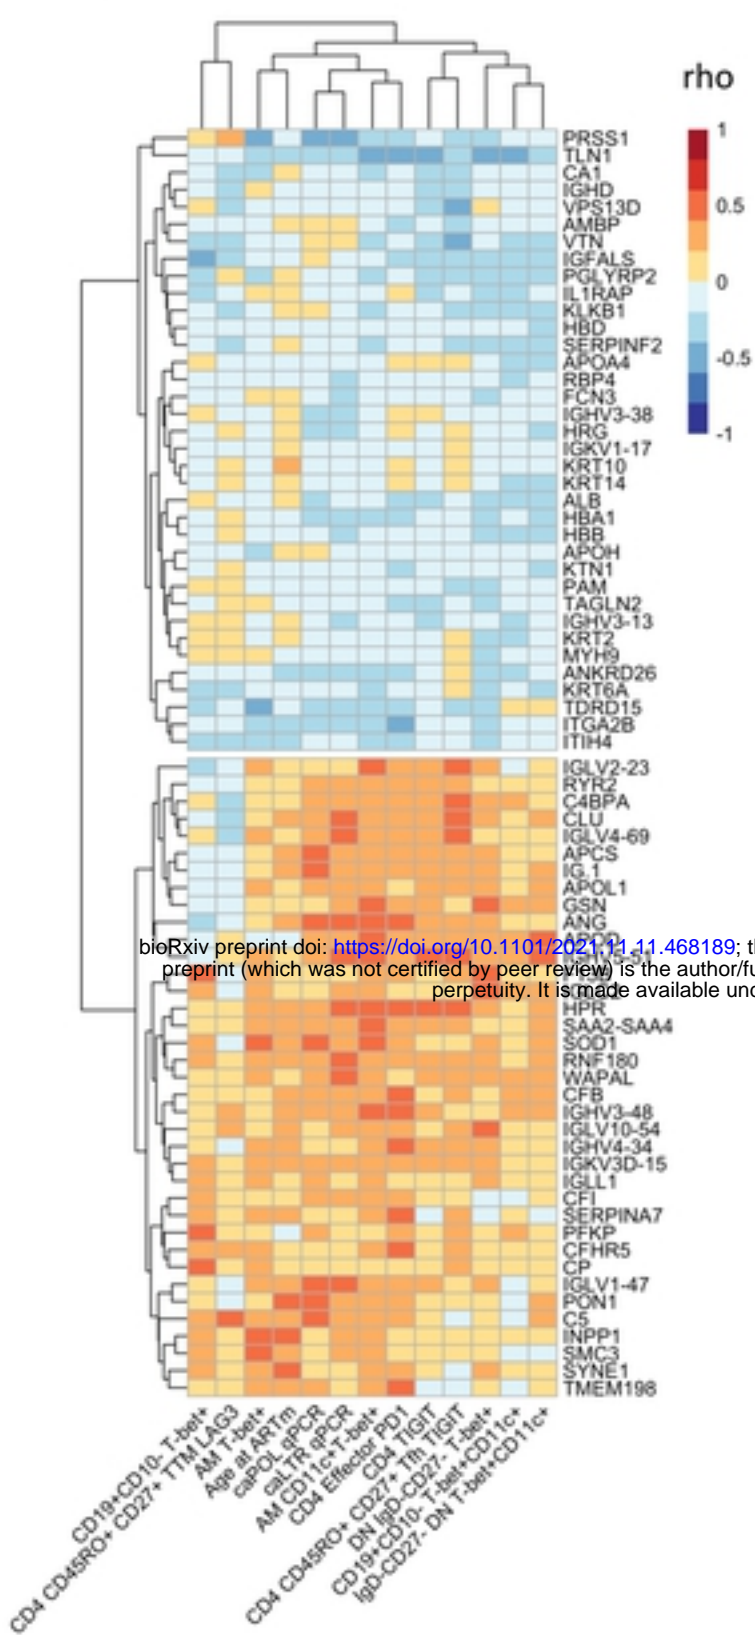

B)

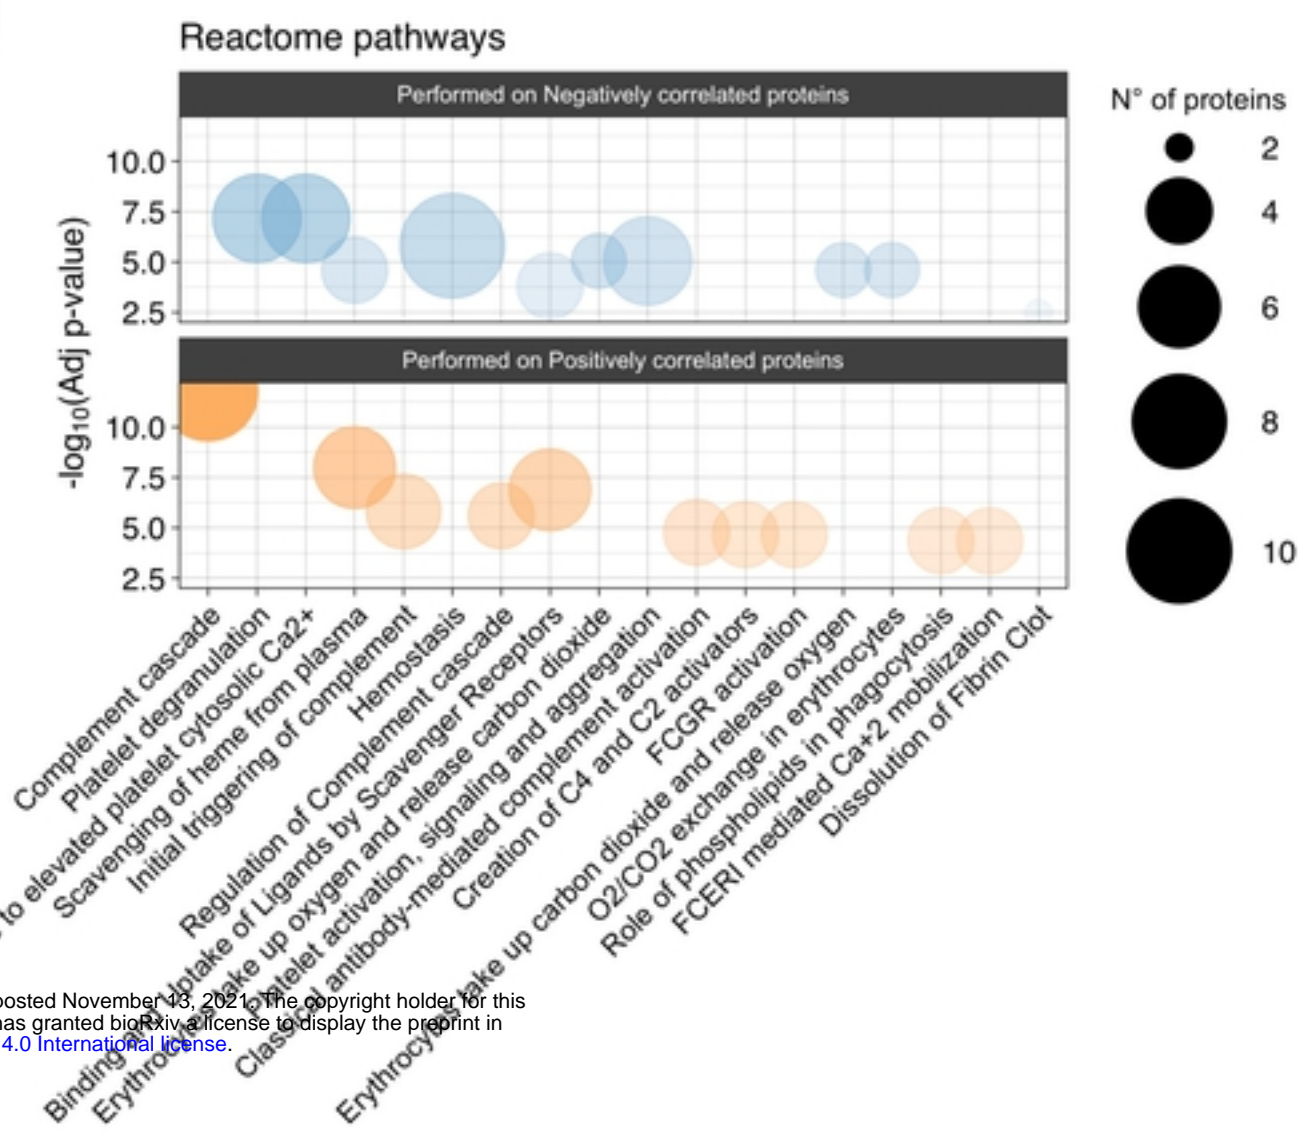

C)

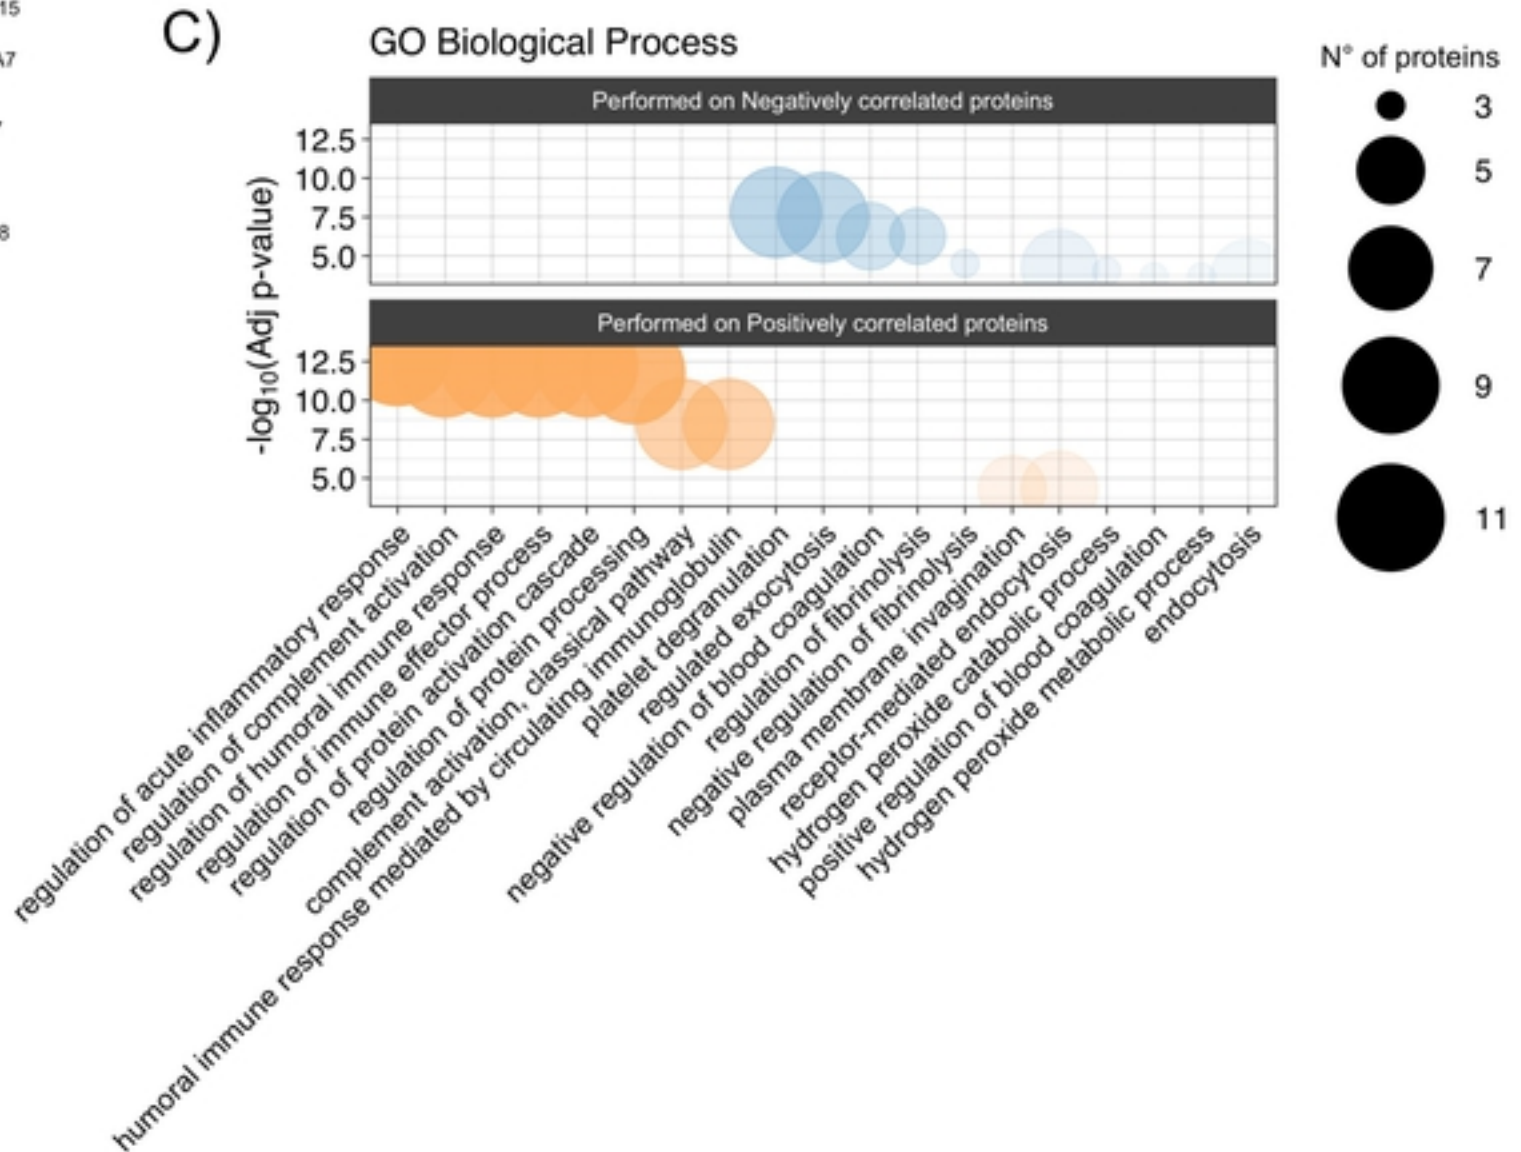

Fig.3

bioRxiv preprint doi: <https://doi.org/10.1101/2021.11.11.468189>; this version posted November 18, 2021. The copyright holder for this preprint (which was not certified by peer review) is the author/funder, who has granted bioRxiv a license to display the preprint in perpetuity. It is made available under aCC-BY 4.0 International license.

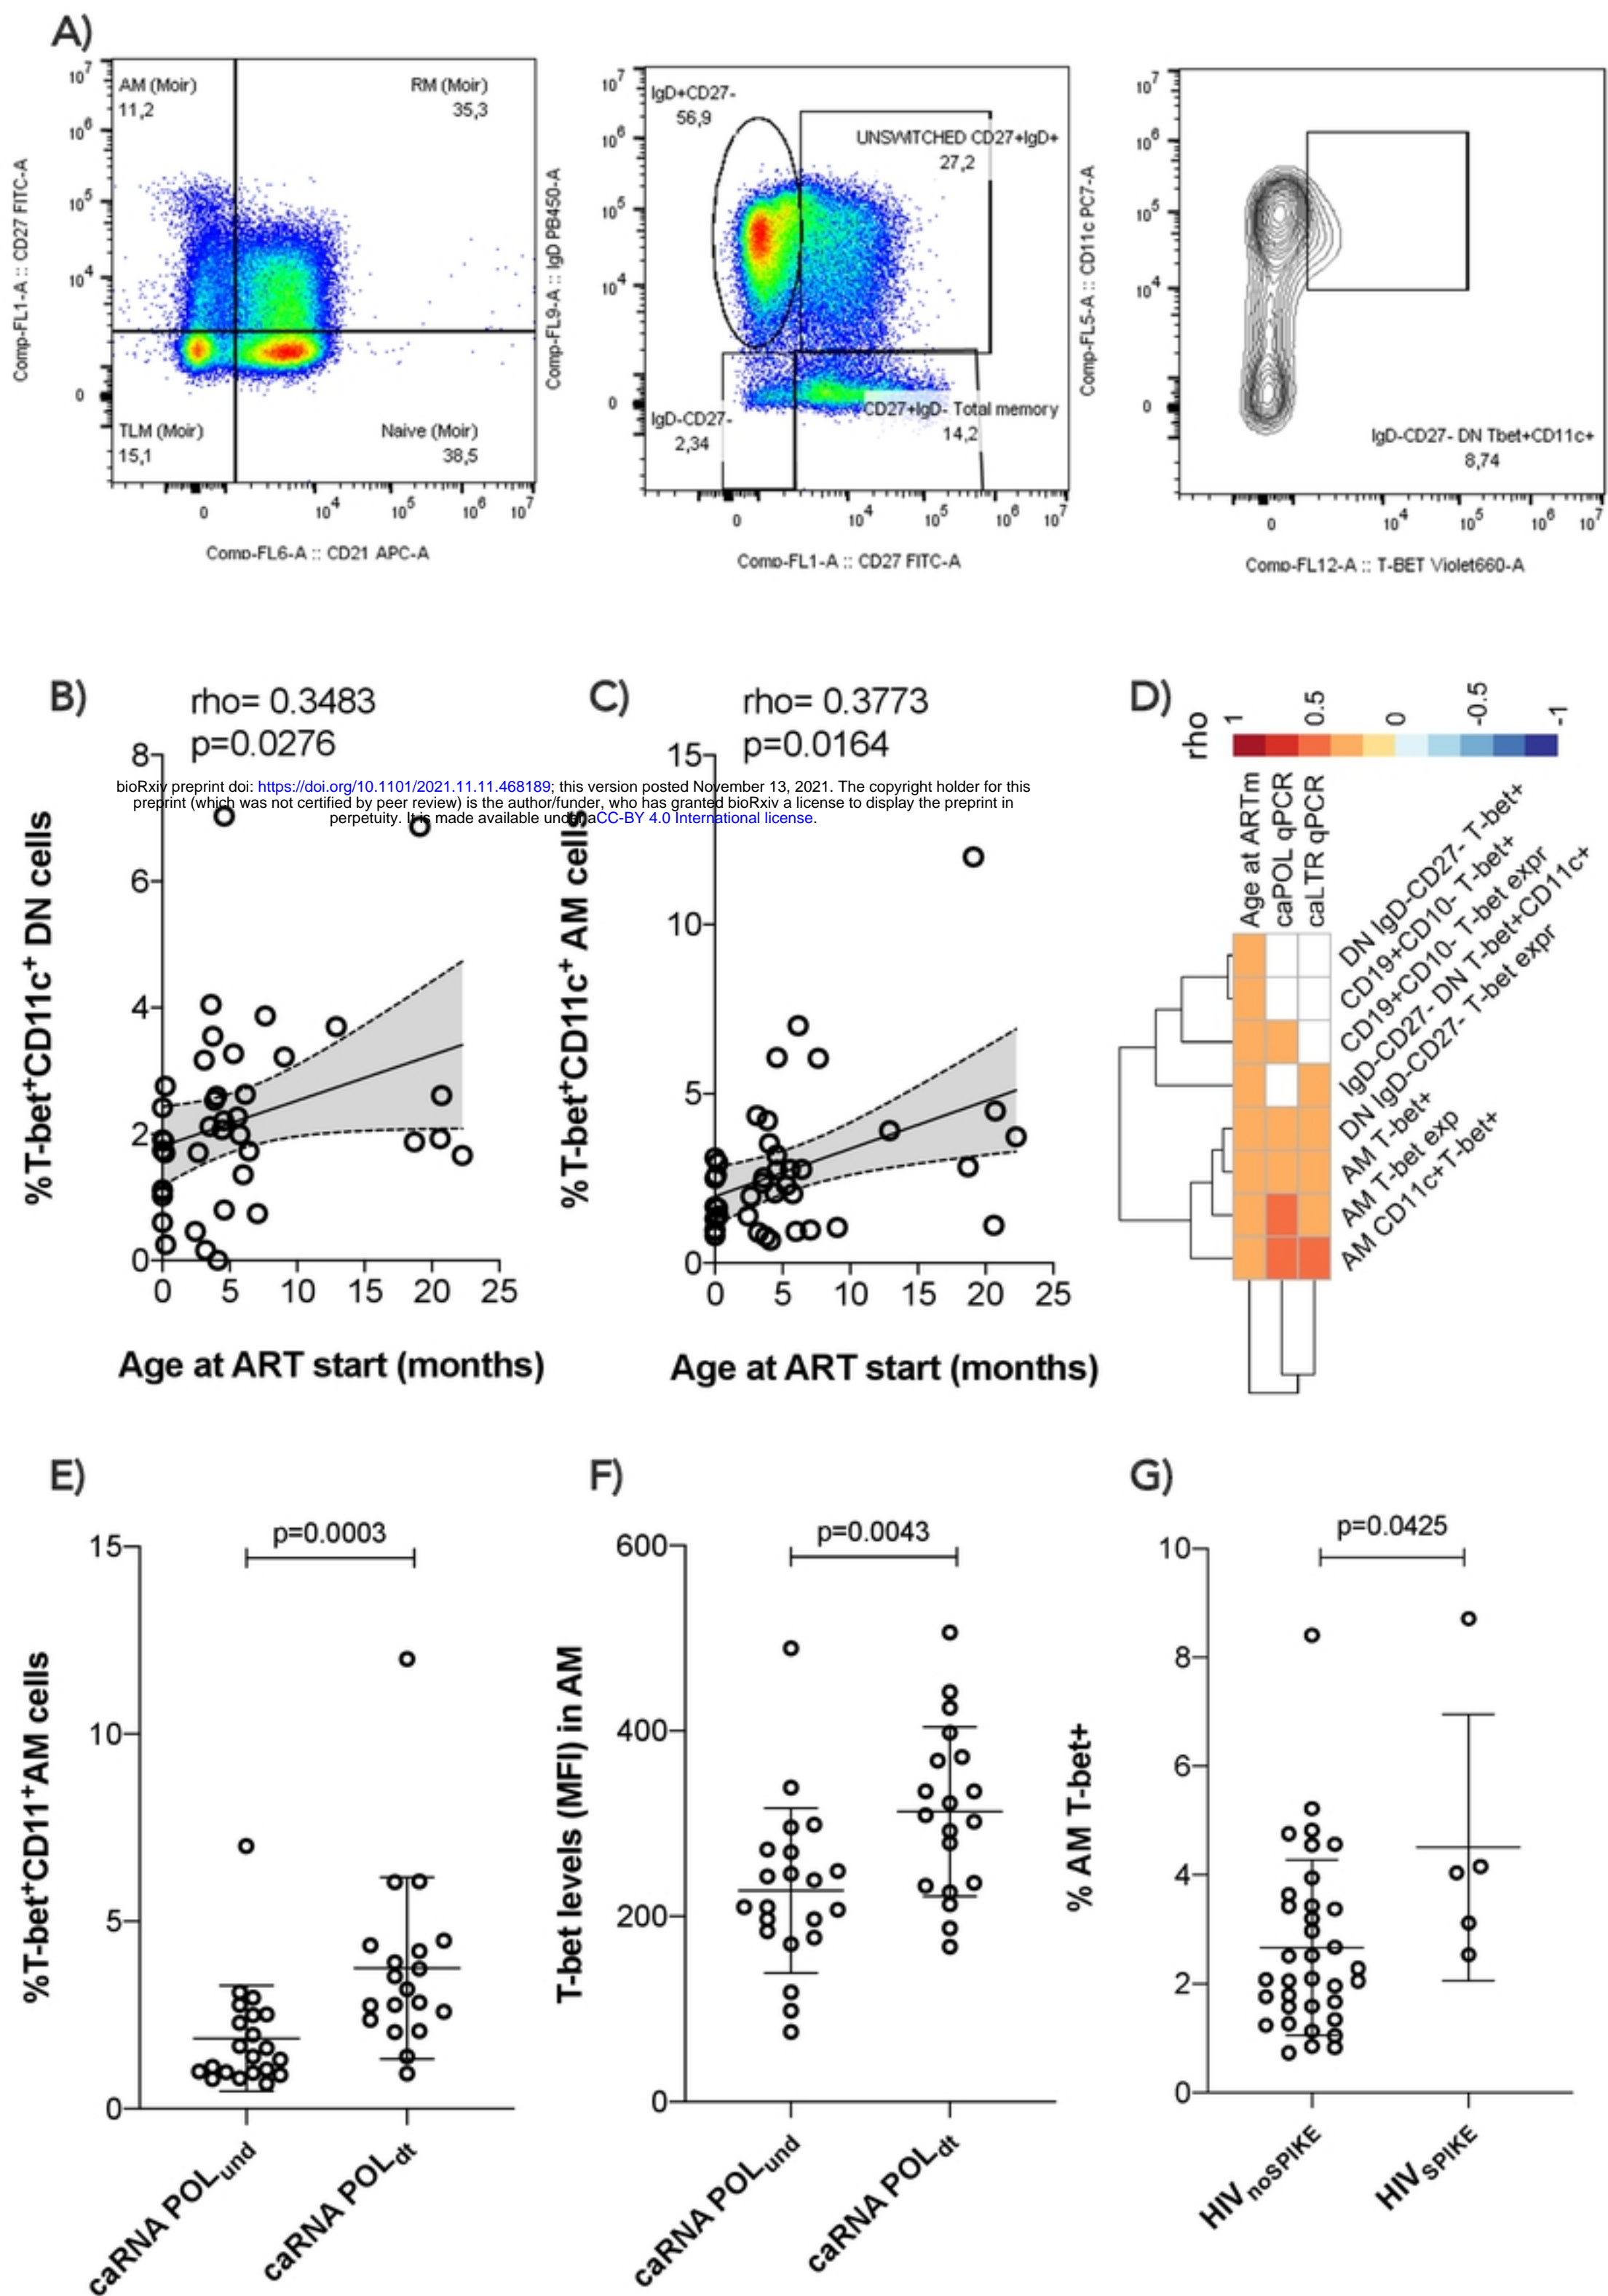

Fig. 1
